# Supplementary material for: Long-term efficacy and safety of erenumab in Japanese patients with episodic and chronic migraine: results from a 28-week open-label treatment period of a randomised trial
Source: PubMed Central journal article supplement — BMJ Open. 2023 Aug 18;13(8):e068616. doi: 10.1136/bmjopen-2022-068616 (PMC10441051; doi:10.1136/bmjopen-2022-068616), 2023-08-18
Supplement: bmjopen-2022-068616.draft_revisions.pdf [file bmjopen-2022-068616.draft_revisions.pdf]

# BMJ Open

BMJ Open is committed to open peer review. As part of this commitment we make the peer review history of every article we publish publicly available.

When an article is published we post the peer reviewers' comments and the authors' responses online. We also post the versions of the paper that were used during peer review. These are the versions that the peer review comments apply to.

The versions of the paper that follow are the versions that were submitted during the peer review process. They are not the versions of record or the final published versions. They should not be cited or distributed as the published version of this manuscript.

BMJ Open is an open access journal and the full, final, typeset and author-corrected version of record of the manuscript is available on our site with no access controls, subscription charges or pay-per-view fees (<http://bmjopen.bmj.com>).

If you have any questions on BMJ Open's open peer review process please email [info.bmjopen@bmj.com](mailto:info.bmjopen@bmj.com)

# BMJ Open

## Long-term efficacy and safety of erenumab in Japanese patients with episodic and chronic migraine: Results from a 28-week open-label treatment period of a randomized trial

|                               |                                                                                                                                                                                                                                                                                                                                                                                                                                                                                                                                                                                                                                      |
|-------------------------------|--------------------------------------------------------------------------------------------------------------------------------------------------------------------------------------------------------------------------------------------------------------------------------------------------------------------------------------------------------------------------------------------------------------------------------------------------------------------------------------------------------------------------------------------------------------------------------------------------------------------------------------|
| Journal:                      | <i>BMJ Open</i>                                                                                                                                                                                                                                                                                                                                                                                                                                                                                                                                                                                                                      |
| Manuscript ID                 | bmjopen-2022-068616                                                                                                                                                                                                                                                                                                                                                                                                                                                                                                                                                                                                                  |
| Article Type:                 | Original research                                                                                                                                                                                                                                                                                                                                                                                                                                                                                                                                                                                                                    |
| Date Submitted by the Author: | 15-Nov-2022                                                                                                                                                                                                                                                                                                                                                                                                                                                                                                                                                                                                                          |
| Complete List of Authors:     | Hirata, Koichi; Dokkyo Ika Daigaku, Department of Neurology<br>Takeshima, Takao ; Tominaga Hospital, Headache Center, Department of Neurology<br>Sakai, Fumihiko ; Saitama Neuropsychiatric Institute, Saitama<br>International Headache Center<br>Numachi, Yotaro ; Amgen KK, Research & Development<br>Yoshida, Ryuji ; Amgen KK, Research & Development<br>Koukakis, Reija ; Amgen Ltd Uxbridge, Biostatistics<br>Hasebe, Miki; Amgen KK, Research & Development<br>Yui, Daishi ; Amgen KK, Research & Development<br>da Silva Lima, Gabriel Paiva ; Amgen Inc, Global Development<br>Cheng, Sunfa; Amgen Inc, Global Development |
| Keywords:                     | NEUROLOGY, Adult neurology < NEUROLOGY, Migraine < NEUROLOGY, Neurological pain < NEUROLOGY, Clinical trials < THERAPEUTICS                                                                                                                                                                                                                                                                                                                                                                                                                                                                                                          |
|                               |                                                                                                                                                                                                                                                                                                                                                                                                                                                                                                                                                                                                                                      |

SCHOLARONE™  
Manuscripts

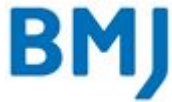

I, the Submitting Author has the right to grant and does grant on behalf of all authors of the Work (as defined in the below author licence), an exclusive licence and/or a non-exclusive licence for contributions from authors who are: i) UK Crown employees; ii) where BMJ has agreed a CC-BY licence shall apply, and/or iii) in accordance with the terms applicable for US Federal Government officers or employees acting as part of their official duties; on a worldwide, perpetual, irrevocable, royalty-free basis to BMJ Publishing Group Ltd ("BMJ") its licensees and where the relevant Journal is co-owned by BMJ to the co-owners of the Journal, to publish the Work in this journal and any other BMJ products and to exploit all rights, as set out in our [licence](#).

The Submitting Author accepts and understands that any supply made under these terms is made by BMJ to the Submitting Author unless you are acting as an employee on behalf of your employer or a postgraduate student of an affiliated institution which is paying any applicable article publishing charge ("APC") for Open Access articles. Where the Submitting Author wishes to make the Work available on an Open Access basis (and intends to pay the relevant APC), the terms of reuse of such Open Access shall be governed by a Creative Commons licence – details of these licences and which [Creative Commons](#) licence will apply to this Work are set out in our licence referred to above.

Other than as permitted in any relevant BMJ Author's Self Archiving Policies, I confirm this Work has not been accepted for publication elsewhere, is not being considered for publication elsewhere and does not duplicate material already published. I confirm all authors consent to publication of this Work and authorise the granting of this licence.

1  
2  
3  
4 1 **Long-term efficacy and safety of erenumab in Japanese patients with episodic and**  
5  
6 2 **chronic migraine: Results from a 28-week open-label treatment period of a randomized**  
7  
8 3 **trial**  
9

10 4  
11  
12  
13 5 Koichi Hirata, MD, PhD,<sup>1</sup> Takao Takeshima, MD, PhD,<sup>2</sup> Fumihiko Sakai, MD, PhD,<sup>3</sup> Yotaro  
14  
15 6 Numachi, MD, PhD,<sup>4</sup> Ryuji Yoshida, PhD,<sup>4</sup> Reija Koukakis,<sup>5</sup> Miki Hasebe, PhD,<sup>4</sup> Daishi Yui,  
16  
17 7 PhD,<sup>4</sup> Gabriel Paiva da Silva Lima, MD,<sup>6</sup> Sunfa Cheng, MD<sup>6</sup>  
18

19  
20 8 <sup>1</sup>Department of Neurology, Dokkyo Medical University, Tochigi, Japan  
21

22  
23 9 <sup>2</sup>Headache Center, Department of Neurology, Tominaga Hospital, Osaka, Japan  
24

25  
26 10 <sup>3</sup>Saitama International Headache Center, Saitama, Japan  
27

28  
29 11 <sup>4</sup>Research & Development, Amgen K.K., Tokyo, Japan  
30

31  
32 12 <sup>5</sup>Biostatistics, Amgen Inc., Uxbridge, UK  
33

34  
35 13 <sup>6</sup>Global Development, Amgen Inc., Thousand Oaks, California, USA  
36

37 14 **Correspondence:**

38  
39  
40 15 Sunfa Cheng, Global Development, Amgen Inc., 1 Amgen Center Drive, Thousand Oaks,  
41  
42 16 California 91320, USA. Email: sunfac@amgen.com  
43

44  
45 17 **Keywords:** Erenumab, CGRP, Episodic migraine, Chronic migraine, Japanese patients  
46

47  
48 18 **Article type:** Original Research  
49

50  
51 19 **Word Count:** 2152 (limit 4000)  
52

53  
54 20  
55

56  
57 21  
58

1  
2  
3 22 **ABSTRACT**  
4 23  
5

6 24 **Objectives:** To evaluate the 1-year efficacy and safety of once-monthly erenumab 70 mg  
7  
8 25 following a 24-week double-blind treatment period (DBTP) of a phase 3 randomized study of  
9  
10 26 Japanese patients with episodic migraine (EM) or chronic migraine (CM).

11  
12  
13 27 **Design:** Multicenter open-label study.  
14

15  
16 28 **Setting:** A total of 41 centers in Japan.  
17

18  
19 29 **Participants:** Patients completing the DBTP continued into the 28-week open-label treatment  
20  
21 30 period (OLTP). 254 of 261 (97.3%) randomized patients continued into the OLTP; 244 (93.5%)  
22  
23 31 completed treatment.  
24

25  
26 32 **Interventions:** Once monthly subcutaneous erenumab 70 mg.  
27

28  
29 33 **Main Outcome measures:** Changes from baseline in monthly migraine days (MMD), monthly  
30  
31 34 acute migraine-specific medication treatment days (MSMD), proportion of  $\geq 50\%$  and  $\geq 75\%$   
32  
33 35 responders in MMD reduction from baseline, and the incidence and exposure-adjusted  
34  
35 36 incidence of treatment-emergent adverse events (TEAEs).  
36

37  
38 37 **Results:** At week 24 of the DBTP, the mean (SE) change from baseline in MMD for the  
39  
40 38 erenumab group was  $-3.8$  (0.4) days (EM,  $-3.0$  [0.4]; CM,  $-5.2$  [0.8]); in MSMD,  $-2.6$  (0.4) days  
41  
42 39 (EM,  $-2.1$  [0.4]; CM,  $-3.4$  [0.7]). At the end of the OLTP (52 weeks postbaseline), the mean  
43  
44 40 (SE) change from baseline in MMD was  $-4.7$  (0.3) days (EM,  $-3.4$  [0.3]; CM,  $-6.9$  [0.6]); in  
45  
46 41 MSMD,  $-3.3$  (0.3) days (EM,  $-2.4$  [0.3]; CM,  $-4.6$  [0.5]). The proportion of  $\geq 50\%$  responders for  
47  
48 42 MMD reduction in the erenumab group was 34.1% at week 24; 44.4% at week 52. The  
49  
50 43 exposure-adjusted incidence of TEAEs was 219.7 per 100 patient-years during the OLTP  
51  
52 44 (DBTP, 251.0 for the erenumab group). The most common TEAEs during the OLTP were  
53  
54 45 nasopharyngitis, constipation, and influenza. No new safety concerns were identified.  
55  
56  
57  
58  
59  
60

1  
2  
3 46 **Conclusions:** Erenumab demonstrated a persistent efficacy in Japanese patients with EM or  
4  
5 47 CM for up to 1 year. Overall safety results from the OLTP were consistent with those from the  
6  
7 48 DBTP.  
8  
9

10 49 **Clinical Trials Registration Number:** NCT03812224  
11  
12

13 50 **Funding:** This study was funded by Amgen.  
14  
15

#### 16 51 **STRENGTHS AND LIMITATIONS OF THIS STUDY**

- 17 52 • This study represents the longest follow-up experience with erenumab in Japanese  
18 53 patients with CM
- 19 54
- 20 54
- 21 55 • The duration of the 28-week OLTP was short  
22 56
- 23 57
- 24 58 • This study lacked a comparator arm  
25 59
- 26 59
- 27
- 28
- 29 60
- 30
- 31
- 32
- 33
- 34
- 35
- 36
- 37
- 38
- 39
- 40
- 41
- 42
- 43
- 44
- 45
- 46
- 47
- 48
- 49
- 50
- 51
- 52
- 53
- 54
- 55
- 56
- 57
- 58
- 59
- 60

## 61 INTRODUCTION

62 Migraine is a common neurological disease worldwide and a leading cause of disability  
63 associated with significant personal and societal effects.[1-3] In Japan, 6% to 8% of the  
64 population is affected by migraine, which places a substantial burden on patients and society  
65 related to quality of life, work productivity, and costs.[4-7] Because of concerns related to  
66 inadequate efficacy and poor tolerability, the use of standard of care oral preventive medications  
67 is low and is associated with high rates of discontinuation.[6,8-11] Therefore, there is an unmet  
68 need for new migraine preventive medications.

69 Erenumab (erenumab-aooe in the United States), a fully human monoclonal antibody against  
70 the calcitonin gene-related peptide (CGRP) receptor, has been approved for the preventive  
71 treatment of adult migraine in over 70 countries worldwide, including the United States (2018),  
72 Europe (2018), and Japan (2021).[12,13] The sustained efficacy and safety of erenumab in the  
73 preventive treatment of episodic migraine (EM) and chronic migraine (CM) have been  
74 demonstrated in several global clinical studies.[14-18] In Japan, approval was based on two  
75 clinical studies in adult patients with EM or CM, which demonstrated erenumab to be safe and  
76 efficacious.[19,20] Sustained efficacy and safety of erenumab for up to 2 years in Japanese  
77 patients with EM have also been demonstrated.[21]

78 Here, we report on the long-term (up to 1 year) efficacy, safety, and tolerability of once-monthly  
79 erenumab 70 mg during a 28-week open-label treatment period (OLTP) after a 24-week double-  
80 blind treatment period (DBTP) of a phase 3 study, which demonstrated favorable efficacy and  
81 safety results for erenumab 70 mg in EM and CM.[20]

82

83

## 84 **METHODS**

### 86 **Study design**

87 This multicenter (41 centers across Japan), 28-week OLTP followed a 24-week, randomized,  
88 double-blind, placebo-controlled, phase 3 study of once-monthly erenumab 70 mg in patients  
89 with EM or CM in Japan (ClinicalTrials.gov identifier NCT03812224) (Figure S1). The first  
90 patient entered the OLTP on October 2, 2019, and the last patient ended the OLTP on  
91 November 20, 2020. Randomization was stratified by migraine status (EM or CM) and migraine  
92 preventive treatment status (ever used or never used) and was assigned by the sponsor using  
93 an interactive response technology system. During the DBTP, patients received once-monthly  
94 erenumab 70 mg or placebo in a 1:1 ratio; in the OLTP, all patients received once-monthly  
95 erenumab 70 mg. Independent ethics committee or institutional review boards at each site  
96 (Table S1) reviewed and approved the protocol and signed the informed patient consent forms  
97 before study initiation. The study conforms to the guidelines set by the International Council for  
98 Harmonisation for Good Clinical Practice and by the Pharmaceuticals and Medical Devices  
99 Agency (PMDA). The study was designed according to the European Medicines Agency (EMA)  
100 guideline on Clinical Investigation of Medicinal Products for the Treatment of Migraine, the  
101 International Headache Society (IHS) Guidelines for Controlled Trials of Drugs in Migraine, and  
102 advice given by the PMDA.[22,23].

### 103 **Patient and Public Involvement Statement**

104 No patients or public representatives were involved in the design, conduct, reporting, or  
105 dissemination efforts of the study results.

### 106 **Patients**

107 Patients who completed the DBTP (parent study) in each treatment group were eligible to  
108 participate in the OLTP and receive once-monthly erenumab 70 mg. Key eligibility criteria in the



1  
2  
3 109 parent study included Japanese patients aged 20 through 65 years with a history of migraine  
4  
5 110 with or without aura (based on medical records or patient self-report) for at least 12 months  
6  
7 111 before screening, as defined in the third edition of the *International Classification of Headache*  
8  
9 112 *Disorders* (ICHD-3) of the IHS, and a diagnosis of EM (<15 headache days/month, ≥4 monthly  
10  
11 113 migraine days [MMD]) or CM (≥15 headache days/month, ≥8 MMD) over the 3 months before  
12  
13 114 screening. A detailed description of the eligibility criteria in the parent study has been described  
14  
15 115 previously.[20]

### 18 116 **Endpoints and assessments**

19 117 Efficacy outcomes during the OLTP included changes from baseline in MMD and monthly acute  
20  
21 118 migraine-specific medication treatment days (MSMD), and the proportion of patients who  
22  
23 119 achieved at least a 50% or 75% reduction in MMD from baseline.

24  
25  
26  
27 120 A migraine day was defined as a migraine (with or without aura) that lasted for at least 4 hours  
28  
29 121 and had at least two of the following pain features: unilateral, throbbing, moderate to severe, or  
30  
31 122 exacerbated with exercise or physical activity; or was associated with nausea, vomiting, or  
32  
33 123 photophobia and phonophobia. A migraine day also included a day in which a patient took a  
34  
35 124 migraine-specific medication during aura or to treat a headache regardless of the duration and  
36  
37 125 associated symptoms. A qualified headache day was a day characterized by onset,  
38  
39 126 continuation, or recurrence of a headache and met one of the following criteria: a migraine  
40  
41 127 headache treated with acute migraine-specific medication, a non-migraine headache that lasted  
42  
43 128 for at least 4 hours, or a headache for which acute headache treatment was used. An acute  
44  
45 129 migraine-specific medication treatment day was defined as any day during which migraine-  
46  
47 130 specific medication was used.

48  
49  
50  
51 131 Safety endpoints included the incidence and exposure-adjusted incidence of treatment-  
52  
53 132 emergent adverse events (TEAEs), clinical laboratory values and vital signs, and the incidence  
54  
55 133 of anti-erenumab antibodies. Exposure-adjusted rates (per 100 patient-years) were calculated

1  
2  
3 134 by dividing the number of patients with at least one reported occurrence of the TEAE of interest  
4  
5 135 by the total time at risk for reporting the TEAE (patient-year) multiplied by 100. The time at risk  
6  
7 136 was defined as the time from the first dose of erenumab to the onset of the TEAE or the end of  
8  
9 137 study date. Reporting exposure-adjusted rates normalizes the rates of adverse events occurring  
10  
11 138 during the DBTP and OLTP to equal exposure periods (ie, events per 100 patient-years), and  
12  
13 139 thus allows for a proper comparison between the DBTP and OLTP.  
14  
15

## 16 140 **Statistical analysis**

17  
18 141 Analysis was performed after all patients had completed safety follow-up at the end of the study  
19  
20 142 and included patients who received at least one dose of erenumab 70 mg in the OLTP. Efficacy  
21  
22 143 and safety data were tabulated by the double-blind treatment group. Efficacy endpoints were  
23  
24 144 analyzed by using descriptive statistics based on observed data without imputation and were  
25  
26 145 tabulated by visit. No formal testing was conducted. Patient incidence and exposure-adjusted  
27  
28 146 incidence of TEAEs were tabulated by treatment group and by system organ class and  
29  
30 preferred term. All analyses were performed using SAS System 9.4 (SAS Institute, Cary, NC,  
31  
32 147 USA).  
33  
34  
35

## 36 149 **RESULTS**

### 37 150 38 39 151 **Patients**

40  
41 152 Of the 261 patients enrolled and randomized in the parent study (erenumab 70 mg, n = 130;  
42  
43 153 placebo, n = 131), 254 (97.3%) entered the OLTP and received at least one dose of the  
44  
45 154 investigational product (IP) and 244 (93.5%) completed the IP. Ten patients (3.8%) discontinued  
46  
47 155 the IP for the following reasons: patient request (n = 4; 1.5%), COVID-19 control measures (n =  
48  
49 156 4; 1.5%), adverse event (n = 1; 0.4%), and pregnancy (n = 1; 0.4%) (Figure S2). Overall, the  
50  
51 157 mean age of patients was 44.4 years, 87% were female, and the majority (76.6%) had used or  
52  
53 158 were using migraine preventive treatment at baseline (Table 1).  
54  
55  
56  
57  
58  
59  
60

159 **Table 1.** Baseline demographics and characteristics

|                                                                           | <b>Total<br/>(N = 261)</b> |
|---------------------------------------------------------------------------|----------------------------|
| Age, mean (SD), years                                                     | 44.4 (8.9)                 |
| Sex, female, n (%)                                                        | 227 (87.0)                 |
| Migraine type*, n (%)                                                     |                            |
| EM                                                                        | 159 (60.9)                 |
| CM                                                                        | 102 (39.1)                 |
| Migraine preventive treatment use, n (%)                                  |                            |
| Ever used (including prior and/or current users)                          | 200 (76.6)                 |
| Never used                                                                | 61 (23.4)                  |
| <b>Baseline clinical characteristics of the OLTP population (N = 254)</b> |                            |
| MMD, mean (SE)                                                            | 12.2 (0.4)                 |
| MSMD, mean (SE)                                                           | 9.4 (0.4)                  |
| MHD, mean (SE)                                                            | 13.8 (0.4)                 |

160 \*Based on actual data collected instead of randomization stratification. N = number of patients  
 161 in the analysis set. n = number of patients with observed data. CM, chronic migraine; EM,  
 162 episodic migraine; MHD, monthly headache days; MMD, monthly migraine days; MSMD,  
 163 monthly acute migraine-specific medication treatment days; OLTP, open-label treatment period;  
 164 SD, standard deviation; SE, standard error of the mean.

### 165 **Efficacy**

166 In the OLTP population (N = 254; EM, n = 155; CM, n = 99), the mean (standard error of the  
 167 mean [SE]) MMD at baseline was 12.2 (0.4) days (EM, 8.3 [0.2] days; CM, 18.2 [0.4] days) and  
 168 the mean (SE) MSMD was 9.4 (0.4) days (EM, 6.8 [0.3] days; CM, 13.6 [0.6] days) (Table 1). At  
 169 the end of the DBTP at week 24, the mean (SE) change from baseline in MMD for the  
 170 erenumab 70 mg group was -3.8 (0.4) days (EM, -3.0 [0.4] days; CM, -5.2 [0.8] days) and -  
 171 1.7 (0.5) days for the placebo group; at the end of the OLTP at week 52, the mean (SE) change  
 172 was -4.7 (0.3) days (EM, -3.4 [0.3]; CM, -6.9 [0.6]) (Figure 1, Table 2).

173 At the end of the DBTP at week 24, the mean (SE) change from baseline in MSMD for the  
 174 erenumab 70 mg group was  $-2.6$  (0.4) days (EM,  $-2.1$  [0.4]; CM,  $-3.4$  [0.7]) and  $-0.7$  (0.4) days  
 175 for the placebo group; at the end of the OLTP at week 52, the mean (SE) change was  $-3.3$  (0.3)  
 176 days (EM,  $-2.4$  [0.3] days; CM,  $-4.6$  [0.5] days) (Figure 1, Table 2). Throughout the 28-week  
 177 OLTP, erenumab 70 mg demonstrated persistent efficacy in MMD and MSMD reduction in  
 178 patients with EM or CM.

179 At week 24 of the DBTP, the proportion of patients who achieved at least a 50% reduction in  
 180 MMD from baseline was 34.1% with erenumab 70 mg (EM, 39.7%; CM, 25.5%) and 19.1% with  
 181 placebo (Figure 2, Table 2). The response was maintained and numerically higher throughout  
 182 the OLTP than it was during the DBTP. At week 36 of the OLTP, 52.8% of the patients achieved  
 183 the 50% threshold for MMD reduction (EM, 58.8%; CM, 43.0%); at week 52, it was 44.4% (EM,  
 184 46.3%; CM, 41.7%). The results were similar for patients responding at the 75% threshold for  
 185 MMD reduction (Figure 2).

186 **Table 2.** Efficacy results during the OLTP

|                                                | EM<br>(N = 155) | CM<br>(N = 99) | Total<br>(N = 254) |
|------------------------------------------------|-----------------|----------------|--------------------|
| <b>Change from baseline in MMD, mean (SE)</b>  |                 |                |                    |
|                                                | n = 78          | n = 51         | n = 129            |
| Week 24*                                       | $-3.0$ (0.4)    | $-5.2$ (0.8)   | $-3.8$ (0.4)       |
|                                                | n = 153         | n = 93         | n = 246            |
| Week 36                                        | $-3.7$ (0.3)    | $-8.0$ (0.6)   | $-5.3$ (0.3)       |
|                                                | n = 147         | n = 96         | n = 243            |
| Week 52                                        | $-3.4$ (0.3)    | $-6.9$ (0.6)   | $-4.7$ (0.3)       |
| <b>Change from baseline in MSMD, mean (SE)</b> |                 |                |                    |
|                                                | n = 78          | n = 51         | n = 129            |
| Week 24*                                       | $-2.1$ (0.4)    | $-3.4$ (0.7)   | $-2.6$ (0.4)       |
|                                                | n = 153         | n = 93         | n = 246            |
| Week 36                                        | $-2.8$ (0.3)    | $-5.2$ (0.5)   | $-3.7$ (0.3)       |
|                                                | n = 147         | n = 96         | n = 243            |
| Week 52                                        | $-2.4$ (0.3)    | $-4.6$ (0.5)   | $-3.3$ (0.3)       |

**Achievement of  $\geq 50\%$  MMD response, n (%)**

|          |           |           |            |
|----------|-----------|-----------|------------|
|          | n = 78    | n = 51    | n = 129    |
| Week 24* | 31 (39.7) | 13 (25.5) | 44 (34.1)  |
|          | n = 153   | n = 93    | n = 246    |
| Week 36  | 90 (58.8) | 40 (43.0) | 130 (52.8) |
|          | n = 147   | n = 96    | n = 243    |
| Week 52  | 68 (46.3) | 40 (41.7) | 108 (44.4) |

187 Efficacy by EM and CM subgroups at week 24 of the DBTP and during the OLTP. \*Data are  
 188 shown for patients in the erenumab 70 mg group at week 24 of the DBTP in the efficacy  
 189 analysis set. N = number of patients in the open-label analysis set; n = number of patients with  
 190 observed data. CM, chronic migraine; DBTP, double-blind treatment period; EM, episodic  
 191 migraine; MMD, monthly migraine days; MSMD, monthly acute migraine-specific medication  
 192 treatment days; OLTP, open-label treatment period; SE, standard error of the mean.

193

**Safety**

194  
 195 The mean (standard deviation) exposure to erenumab 70 mg during the OLTP was 192.6 (20.0)  
 196 days (total exposure to open-label treatment, 133.9 patient-years). The majority of patients  
 197 (92.1%) received all seven doses of erenumab 70 mg during the OLTP.

198 During the OLTP, the incidence of TEAEs was 71.3% (181/254) (Table 3). The exposure-  
 199 adjusted incidence of TEAEs during the OLTP was 219.7 per 100 patient-years, which is similar  
 200 to that in the erenumab group (251.0 per 100 patient-years) and in the placebo group (197.7 per  
 201 100 patient-years) during the DBTP. The majority of patients (62.2% [158/254]) experienced  
 202 TEAEs of grade 2 or less. The most common ( $\geq 5$  per 100 patient-years) TEAEs reported with  
 203 erenumab (OLTP vs DBTP) were nasopharyngitis (32.8 vs 67.2 per 100 patient-years),  
 204 constipation (7.8 vs 10.3 per 100 patient-years), influenza (6.6 vs 1.7 per 100 patient-years),  
 205 gastroenteritis (6.5 vs 6.8 per 100 patient-years), and urticaria (5.9 vs 1.7 per 100 patient-  
 206 years). Seven patients (2.8%) reported serious adverse events with erenumab during the OLTP,

207 corresponding to an exposure-adjusted rate of 4.1 per 100 patient-years, which is similar to the  
 208 rate reported during the DBTP in each treatment group (3.4 per 100 patient-years). During the  
 209 OLTP, one patient with a serious adverse event discontinued treatment because of a grade 3  
 210 serious adverse event of drug eruption, which was considered by the investigator to be  
 211 unrelated to erenumab treatment. No deaths were reported during the study. No clinically  
 212 significant changes in laboratory values or vital signs were observed throughout the OLTP.

213 Of the 254 patients in the OLTP, nine (3.5%) developed anti-erenumab binding antibodies for  
 214 the first time (negative or no result before the first OLTP dose), which is consistent with that  
 215 observed during the DBTP (5.4%) (Table 3). Of the nine patients who were positive for binding  
 216 antibodies during the OLTP, six received placebo during the DBTP and three received  
 217 erenumab during the DBTP and the OLTP. During the entire study, 16 patients (6.3%)  
 218 developed anti-erenumab binding antibodies after erenumab treatment, of which 6 (37.5%) had  
 219 transient antibodies (negative result at the last assessment). No patients developed anti-  
 220 erenumab neutralizing antibodies.

221 **Table 3.** Safety results during the DBTP and OLTP

|                                  | DBTP                 |                             | OLTP               |
|----------------------------------|----------------------|-----------------------------|--------------------|
|                                  | Placebo<br>(N = 131) | Erenumab 70 mg<br>(N = 130) | Total<br>(N = 254) |
| All TEAEs, n (%) [r]             | 78 (59.5) [197.7]    | 86 (66.2) [251.0]           | 181 (71.3) [219.7] |
| Grade ≥2                         | 67 (51.1) [159.2]    | 72 (55.4) [180.6]           | 158 (62.2) [159.9] |
| Grade ≥3                         | 2 (1.5) [3.4]        | 4 (3.1) [6.8]               | 12 (4.7) [7.1]     |
| Serious AEs                      | 2 (1.5) [3.4]        | 2 (1.5) [3.4]               | 7 (2.8) [4.1]      |
| Leading to IP<br>discontinuation | 0 (0.0) [0.0]        | 0 (0.0) [0.0]               | 1 (0.4) [0.6]      |
| Fatal AEs                        | 0 (0.0) [0.0]        | 0 (0.0) [0.0]               | 0 (0.0) [0.0]      |
| Most common TEAEs, n (%) [r]*    |                      |                             |                    |
| Nasopharyngitis                  | 37 (28.2) [74.4]     | 35 (26.9) [67.2]            | 49 (19.3) [32.8]   |
| Constipation                     | 1 (0.8) [1.7]        | 6 (4.6) [10.3]              | 13 (5.1) [7.8]     |

|                 |               |               |                |
|-----------------|---------------|---------------|----------------|
| Influenza       | 2 (1.5) [3.4] | 1 (0.8) [1.7] | 11 (4.3) [6.6] |
| Gastroenteritis | 4 (3.1) [6.7] | 4 (3.1) [6.8] | 11 (4.3) [6.5] |
| Urticaria       | 0 (0.0) [0.0] | 1 (0.8) [1.7] | 10 (3.9) [5.9] |

#### Developed anti-erenumab antibodies, n (%)

|                                                 |    |                     |                     |
|-------------------------------------------------|----|---------------------|---------------------|
| Developed binding anti-erenumab antibodies      | NA | n' = 129<br>7 (5.4) | n' = 254<br>9 (3.5) |
| Transient <sup>†</sup>                          | NA | 2 (28.6)            | 4 (44.4)            |
| Developed neutralizing anti-erenumab antibodies | NA | NA                  | NA                  |

\*Exposure-adjusted rates of TEAEs of at least 5 per 100 patient-years during the OLTP. <sup>†</sup>A negative result was reported at the patient's last time point within the study period. N = number of patients in the analysis set; n = number of patients with at least one occurrence of a TEAE or number of patients who developed anti-erenumab antibodies; n' = patients with a postbaseline result during the DBTP or OLTP; r = exposure-adjusted patient incidence rate per 100 patient-years. AE, adverse event; DBTP, double-blind treatment period; IP, investigational product; NA, not applicable; OLTP, open-label treatment period; TEAE, treatment-emergent adverse event.

## DISCUSSION

The results of this 28-week OLTP study of erenumab 70 mg in Japanese patients with EM or CM demonstrated a persistence of efficacy for up to 1 year and a safety profile similar to that reported during the DBTP. From week 24 of the DBTP to the end of the OLTP at week 52, the reduction from baseline in MMD and MSMD, and the proportion of  $\geq 50\%$  and  $\geq 75\%$  responders in MMD reduction were maintained.

The incidence and exposure-adjusted incidence of TEAEs during the OLTP were consistent with those from the DBTP and previous studies,[18,20,21] except for influenza and urticaria, which were numerically higher during the OLTP than they were during the DBTP. Furthermore, although the exposure-adjusted rates of constipation during the OLTP (7.8 per 100 patient-years) were consistent with those during the DBTP (10.0 per 100 patient-years), they were

1  
2  
3 240 higher than those reported during the OLTP of the phase 2 study in Japanese patients with EM  
4  
5 241 (2.6 per 100 patient-years).[21] In addition, no new safety concerns regarding clinically relevant  
6  
7 242 changes in laboratory assessments and vital signs were identified throughout the OLTP. The  
8  
9 243 high proportion of patients completing erenumab treatment reflects the excellent tolerability and  
10  
11 244 sustained efficacy. The high retention rate prevents the bias that may be seen in open-label  
12  
13 245 extension studies where patients may drop out for diminished efficacy, thus skewing the efficacy  
14  
15 246 results over time.

16  
17  
18 247 This study represents the longest follow-up experience with erenumab in Japanese patients with  
19  
20 248 CM and shows long-term efficacy and safety that are comparable to that seen in a global long-  
21  
22 249 term study of erenumab in patients with CM.[24] In the global study, the reduction in MMD and  
23  
24 250 MSMD after 52 weeks for the erenumab 70 mg group was –7.8 days and –5.8 days,  
25  
26 251 respectively; 47.4% of the patients achieved at least a 50% reduction from baseline in MMD.  
27  
28 252 Nonetheless, these data support long-term treatment with erenumab in Japanese patients with  
29  
30 253 EM and CM.

## 31 254 **CONCLUSION**

32  
33  
34 255 Erenumab demonstrated a persistence of efficacy for up to 1 year in Japanese patients with EM  
35  
36 256 or CM and had a safety profile similar to that observed in the DBTP. No new safety signals were  
37  
38 257 identified during the OLTP.

## 39 258 **Ethics Approval**

40  
41 259 This study involved human patients and was approved by ethics committees and institutional  
42  
43 260 review boards listed in the supplementary appendix (Table S1).

## 44 261 **Acknowledgments**

45  
46 262 Erenumab is codeveloped by Amgen and Novartis. The authors thank the patients and all the  
47  
48 263 investigators who participated in this study. Medical writing support was provided by Qais Al-



1  
2  
3 264 Hadid, PhD (Amgen). Editorial support was provided by Sangeeta P.C. (Cactus  
4  
5 265 Communications).

6  
7  
8 266 **Author contributions**

9  
10  
11 267 SC and GPL contributed to the conception and design of the study and acquired the data. All  
12  
13 268 authors analyzed and interpreted the data. All authors drafted the manuscript and critically  
14  
15 269 reviewed and revised the manuscript for intellectual content. All authors provided final approval  
16  
17 270 of the version to be published.

18  
19  
20 271 **Conflict of Interest Statement**

21  
22  
23 272 KH reports royalties from Amgen, Astellas, Daiichi Sankyo, Eisai, Merck Sharp & Dohme, and  
24  
25 273 Pfizer. TT has nothing to disclose. FS reports consulting fees from Amgen. RY, RK, MH, DY,  
26  
27 274 GPL, and SC are employees of and own stock in Amgen. YN owns stock in Amgen.

28  
29  
30 275 **Institutional review board approval**

31  
32 276 The Institutional review boards at each study center (Table S1) approved the study protocol,  
33  
34 277 informed consent forms, and any materials provided to the patients.

35  
36  
37 278 **Data availability statement**

38  
39  
40 279 Qualified researchers may request data from Amgen clinical studies. Complete details are  
41  
42 280 available at the following: [https://wwwext.amgen.com/science/clinical-trials/clinical-data-](https://wwwext.amgen.com/science/clinical-trials/clinical-data-transparency-practices/clinical-trial-data-sharing-request)  
43  
44 281 [transparency-practices/clinical-trial-data-sharing-request](https://wwwext.amgen.com/science/clinical-trials/clinical-data-transparency-practices/clinical-trial-data-sharing-request).

45  
46  
47 282 **Funding:** This study was funded by Amgen. No grants or awards were used for funding of this  
48  
49 283 study.

50  
51  
52 284

285 **REFERENCES**

- 286
- 287 1. Lipton RB, Bigal ME, Diamond M, et al. Migraine prevalence, disease burden, and the need  
288 for preventive therapy. *Neurology* 2007;68(5):343-9.
  - 289 2. Stovner L, Hagen K, Jensen R, et al. The global burden of headache: a documentation of  
290 headache prevalence and disability worldwide. *Cephalalgia* 2007;27(3):193-210.
  - 291 3. Agosti R. Migraine Burden of Disease: From the Patient's Experience to a Socio-Economic  
292 View. *Headache* 2018;58 Suppl 1:17-32.
  - 293 4. Sakai F, Igarashi H. Prevalence of migraine in Japan: a nationwide survey. *Cephalalgia*  
294 1997;17(1):15-22.
  - 295 5. Takeshima T, Ishizaki K, Fukuhara Y, et al. Population-based door-to-door survey of migraine  
296 in Japan: the Daisen study. *Headache* 2004;44(1):8-19.
  - 297 6. Hirata K, Ueda K, Komori M, et al. Comprehensive population-based survey of migraine in  
298 Japan: results of the Observational Survey of the Epidemiology, Treatment, and Care Of  
299 Migraine (OVERCOME [Japan]) study. *Curr Med Res Opin* 2021;37(11):1945-55.
  - 300 7. Kikui S, Chen Y, Todaka H, et al. Burden of migraine among Japanese patients: a cross-  
301 sectional National Health and Wellness Survey. *J Headache Pain* 2020;21(1):110.
  - 302 8. Meyers JL, Davis KL, Lenz RA, et al. Treatment patterns and characteristics of patients with  
303 migraine in Japan: A retrospective analysis of health insurance claims data. *Cephalalgia*  
304 2019;39(12):1518-34.
  - 305 9. Blumenfeld AM, Bloudek LM, Becker WJ, et al. Patterns of use and reasons for  
306 discontinuation of prophylactic medications for episodic migraine and chronic migraine:  
307 results from the second international burden of migraine study (IBMS-II). *Headache*  
308 2013;53(4):644-55.
  - 309 10. Hepp Z, Bloudek LM, Varon SF. Systematic review of migraine prophylaxis adherence and  
310 persistence. *J Manag Care Pharm* 2014;20(1):22-33.

- 1  
2  
3 311 11. Hepp Z, Dodick DW, Varon SF, et al. Adherence to oral migraine-preventive medications  
4  
5 312 among patients with chronic migraine. *Cephalalgia* 2015;35(6):478-88.  
6  
7 313 12. Aimovig (erenumab-aooe). Full Prescribing Information, Amgen, Inc., Thousand Oaks, CA,  
8  
9 314 2020.  
10  
11 315 13. Aimovig (erenumab). Summary of Product Characteristics. Dublin, Ireland: Novartis  
12  
13 316 Europharm Limited; 2018.  
14  
15 317 14. Sun H, Dodick DW, Silberstein S, et al. Safety and efficacy of AMG 334 for prevention of  
16  
17 318 episodic migraine: a randomised, double-blind, placebo-controlled, phase 2 trial. *Lancet*  
18  
19 319 *Neurol* 2016;15(4):382-90.  
20  
21  
22 320 15. Tepper S, Ashina M, Reuter U, et al. Safety and efficacy of erenumab for preventive  
23  
24 321 treatment of chronic migraine: a randomised, double-blind, placebo-controlled phase 2  
25  
26 322 trial. *Lancet Neurol* 2017;16(6):425-34.  
27  
28 323 16. Goadsby PJ, Reuter U, Hallstrom Y, et al. A Controlled Trial of Erenumab for Episodic  
29  
30 324 Migraine. *N Engl J Med* 2017;377(22):2123-32.  
31  
32  
33 325 17. Dodick DW, Ashina M, Brandes JL, et al. ARISE: A Phase 3 randomized trial of erenumab  
34  
35 326 for episodic migraine. *Cephalalgia* 2018;38(6):1026-37.  
36  
37 327 18. Ashina M, Goadsby PJ, Reuter U, et al. Long-term efficacy and safety of erenumab in  
38  
39 328 migraine prevention: Results from a 5-year, open-label treatment phase of a randomized  
40  
41 329 clinical trial. *Eur J Neurol* 2021;28(5):1716-25.  
42  
43 330 19. Sakai F, Takeshima T, Tatsuoka Y, et al. A Randomized Phase 2 Study of Erenumab for the  
44  
45 331 Prevention of Episodic Migraine in Japanese Adults. *Headache* 2019;59(10):1731-42.  
46  
47 332 20. Takeshima T, Sakai F, Hirata K, et al. Erenumab treatment for migraine prevention in  
48  
49 333 Japanese patients: Efficacy and safety results from a Phase 3, randomized, double-  
50  
51 334 blind, placebo-controlled study. *Headache* 2021;61(6):927-35.  
52  
53  
54  
55  
56  
57  
58  
59  
60

- 1  
2  
3 335 21. Sakai F, Takeshima T, Tatsuoka Y, et al. Long-term efficacy and safety during open-label  
4  
5 336 erenumab treatment in Japanese patients with episodic migraine. *Headache*  
6  
7 337 2021;61(4):653-61.  
8  
9 338 22. Tassorelli C, Diener HC, Dodick DW, et al. Guidelines of the International Headache Society  
10  
11 339 for controlled trials of preventive treatment of chronic migraine in adults. *Cephalalgia*  
12  
13 340 2018;38(5):815-32.  
14  
15 341 23. Tfelt-Hansen P, Pascual J, Ramadan N, et al. Guidelines for controlled trials of drugs in  
16  
17 342 migraine: third edition. A guide for investigators. *Cephalalgia* 2012;32(1):6-38.  
18  
19 343 24. Tepper SJ, Ashina M, Reuter U, et al. Long-term safety and efficacy of erenumab in patients  
20  
21 344 with chronic migraine: Results from a 52-week, open-label extension study. *Cephalalgia*  
22  
23 345 2020;40(6):543-53.  
24  
25  
26  
27 346  
28  
29  
30 347  
31  
32  
33  
34  
35  
36  
37  
38  
39  
40  
41  
42  
43  
44  
45  
46  
47  
48  
49  
50  
51  
52  
53  
54  
55  
56  
57  
58  
59  
60

1  
2  
3 348 **Figure 1.** Change in (A) MMD and (B) MSMD from baseline. The mean (SE) change from  
4  
5 349 baseline in MMD and MSMD during the DBTP and OLTP is shown for the treatment groups. For  
6  
7 350 the OLTP, data are shown for the total population. The dotted line indicates that patients in the  
8  
9 351 placebo group during the DBTP received erenumab 70 mg during the OLTP starting at week 24.  
10  
11 352 \*The number of patients in the efficacy analysis set during the DBTP. Error bars represent SE. n  
12  
13 = number of patients with observed data. DBTP, double-blind treatment period; MMD, monthly  
14 353 migraine days; MSMD, monthly acute migraine-specific medication treatment days; OLTP,  
15  
16 354 open-label treatment period; SE, standard error of the mean.  
17  
18 355

19  
20  
21 356 **Figure 2.** Patients achieving a (A)  $\geq 50\%$  and (B)  $\geq 75\%$  reduction in MMD from baseline. For the  
22  
23 357 OLTP, data are shown for the total population. The dotted line indicates that patients in the  
24  
25 358 placebo group during the DBTP received erenumab 70 mg during the OLTP starting at week 24.  
26  
27 359 \*The number of patients in the efficacy analysis set during the DBTP. n = number of patients  
28  
29 360 with observed data. DBTP, double-blind treatment period; MMD, monthly migraine days; OLTP,  
30  
31 361 open-label treatment period.  
32  
33

34 362  
35  
36  
37  
38  
39  
40  
41  
42  
43  
44  
45  
46  
47  
48  
49  
50  
51  
52  
53  
54  
55  
56  
57  
58  
59  
60

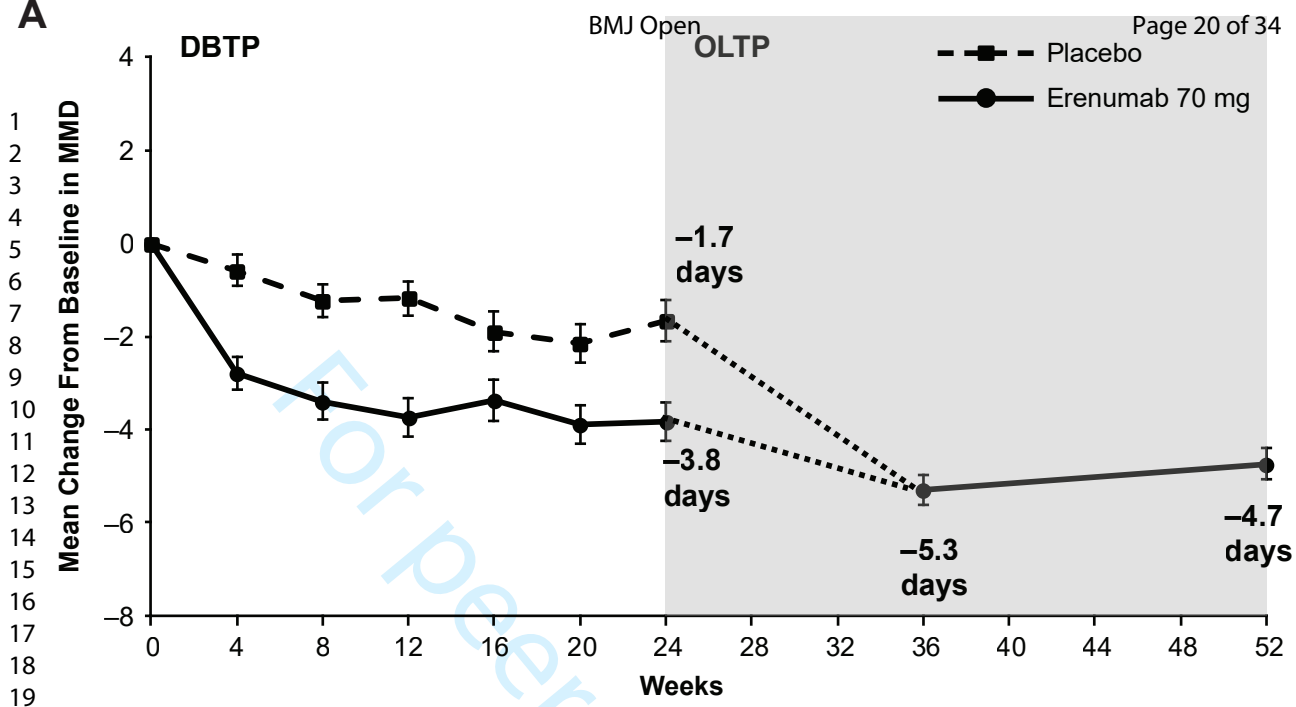

|                    |      |      |      |      |      |      |     |     |
|--------------------|------|------|------|------|------|------|-----|-----|
| Placebo (n)        | 130* | 130* | 128* | 128* | 126* | 127* |     |     |
| Erenumab 70 mg (n) | 130* | 129* | 128* | 128* | 128* | 129* | 246 | 243 |

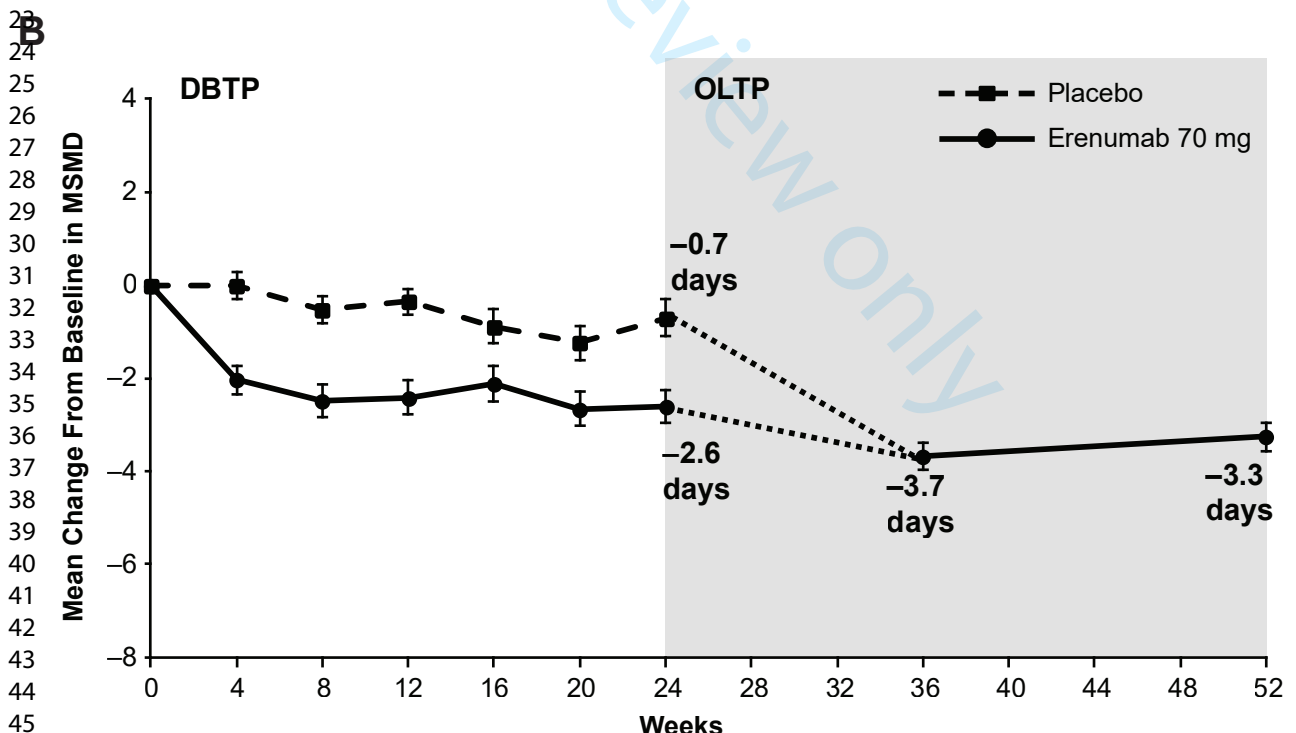

For peer review only - <http://bmjopen.bmj.com/site/about/guidelines.xhtml>

|                    |      |      |      |      |      |      |     |     |
|--------------------|------|------|------|------|------|------|-----|-----|
| Placebo (n)        | 130* | 130* | 128* | 128* | 126* | 127* |     |     |
| Erenumab 70 mg (n) | 130* | 129* | 128* | 128* | 128* | 129* | 246 | 243 |

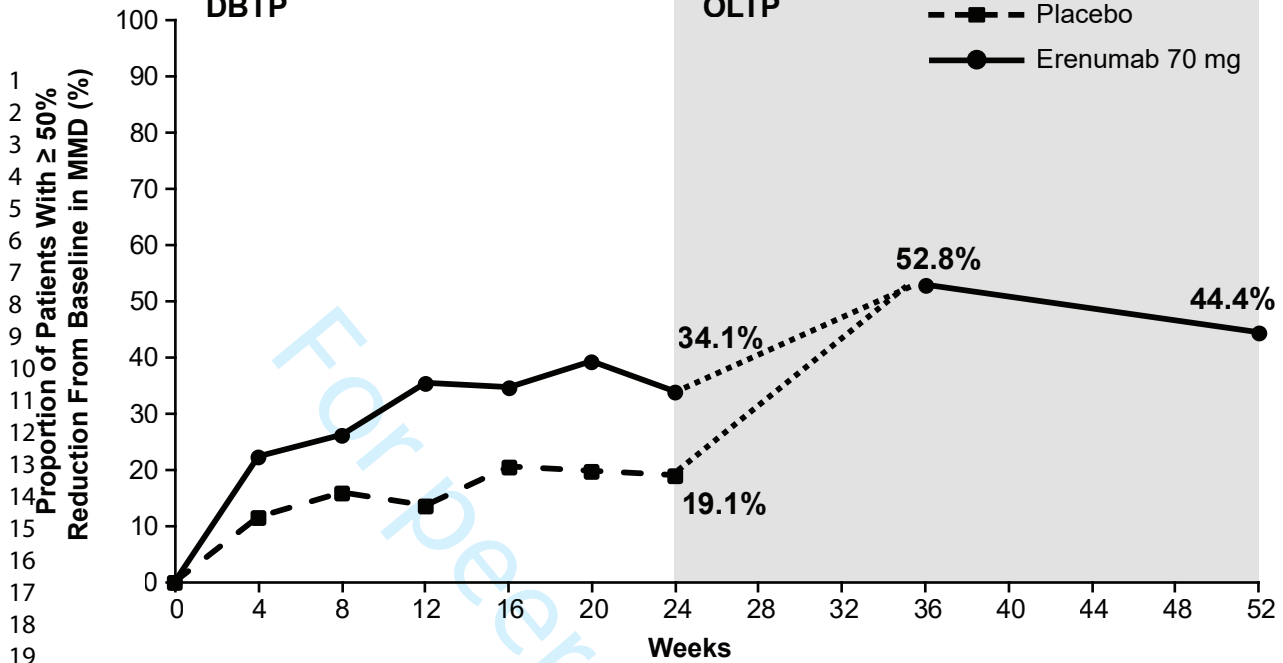

|                    |      |      |      |      |      |      |     |     |
|--------------------|------|------|------|------|------|------|-----|-----|
| Placebo (n)        | 131* | 131* | 131* | 131* | 131* | 131* |     |     |
| Erenumab 70 mg (n) | 130* | 130* | 130* | 130* | 130* | 130* | 246 | 243 |

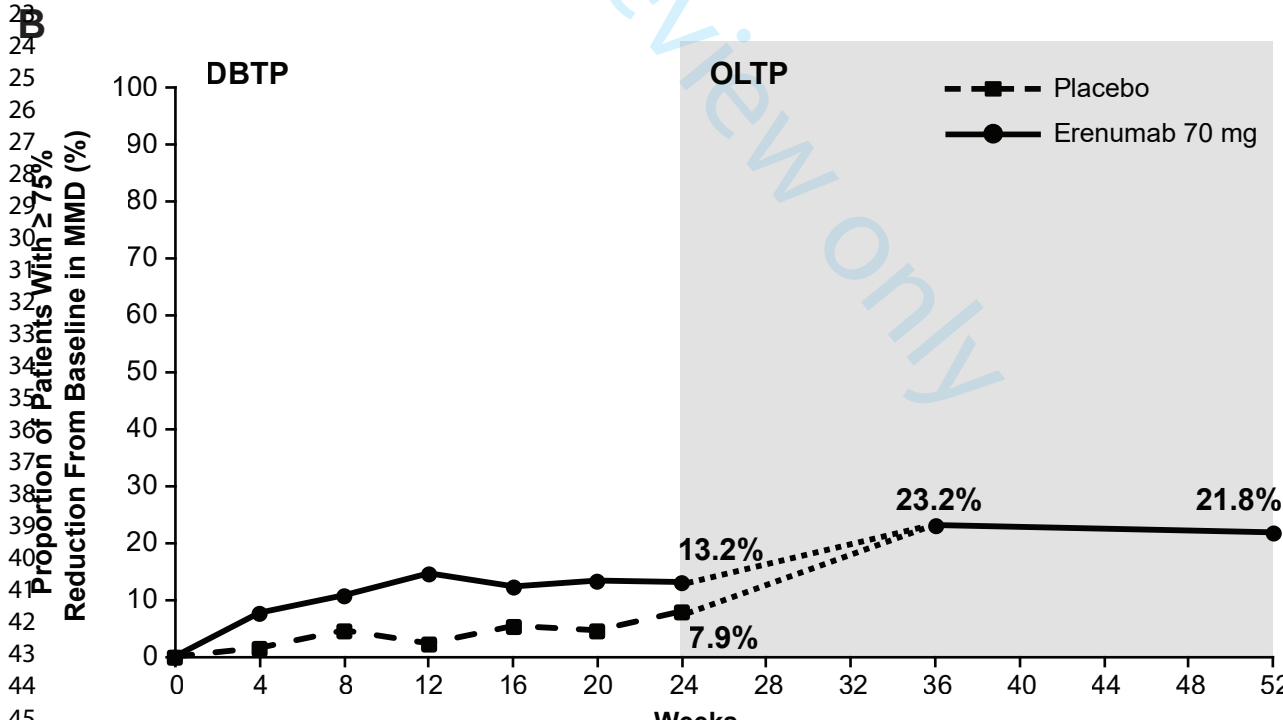

|                    |      |      |      |      |      |      |     |     |
|--------------------|------|------|------|------|------|------|-----|-----|
| Placebo (n)        | 130* | 130* | 128* | 128* | 126* | 127* |     |     |
| Erenumab 70 mg (n) | 130* | 129* | 128* | 128* | 128* | 129* | 246 | 243 |

## SUPPLEMENTARY APPENDIX

### Table of Contents

|                                        |   |
|----------------------------------------|---|
| Figure S1 – Study Design.....          | 2 |
| Figure S2 – Patient Disposition.....   | 3 |
| Table S1 – Ethics Committees/IRBs..... | 4 |

For peer review only



# Figure S1

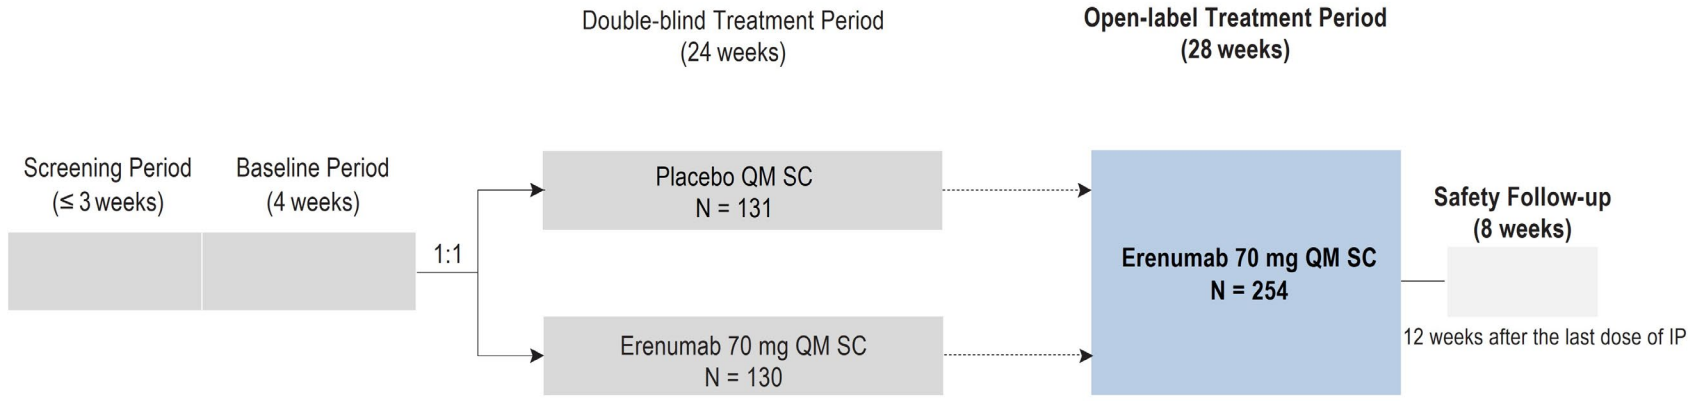

**Study design.** IP, investigational product; QM, once monthly; SC, subcutaneous.

Peer review only

Figure S2

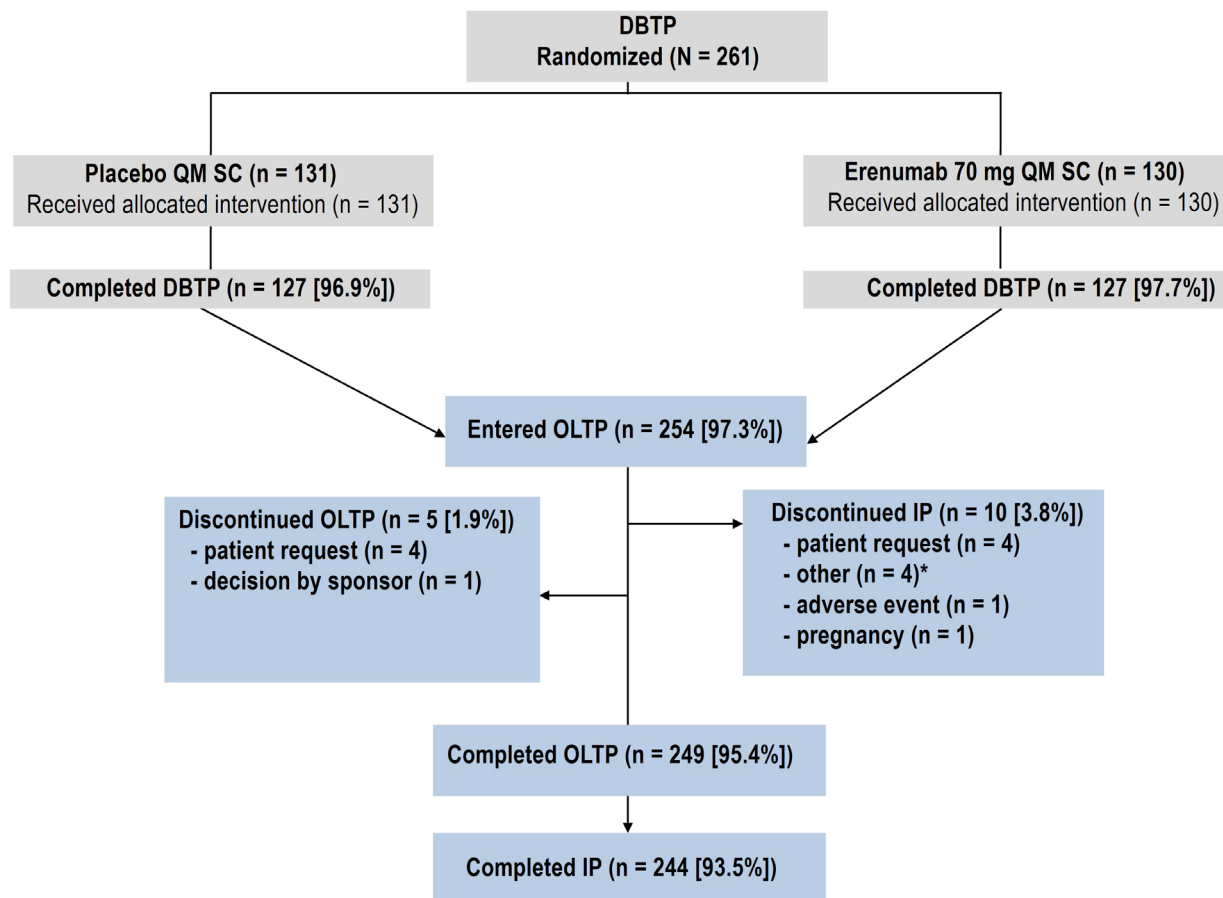

**Patient disposition.** \*Other refers to COVID-19 control measures. COVID-19, coronavirus disease 2019; DBTP, double-blind treatment period; IP, investigational product; OLTP, open-label treatment period; QM, once monthly; SC, subcutaneous.

**Table S1**

| Study Number | Site Number | Site Name                                        | IRB/IEC Name                                                                    | IRB/IEC Address                                                         |
|--------------|-------------|--------------------------------------------------|---------------------------------------------------------------------------------|-------------------------------------------------------------------------|
| 20170609     | 34001       | Saitama Neuropsychiatric Institute               | Saitama Medical University Hospital Institutional Review Board                  | 38 Moroyamamachi Morohongo, Iruma-gun, Saitama, 350-0495, Japan         |
| 20170609     | 34002       | Fukuuchi Pain Clinic                             | Tokyo-Eki Center-Building Clinic Institutional Review Board                     | 3-3-14 Nihombashi, Chuo-ku, Tokyo, 103-0027, Japan                      |
| 20170609     | 34003       | Kumamoto City Hospital                           | Kumamoto City Hospital Institutional Review Board                               | 4-1-60 Higashimachi Higashi-ku, Kumamoto-shi, Kumamoto, 862-8505, Japan |
| 20170609     | 34005       | Dokkyo Medical University Hospital               | Dokkyo Medical University Hospital Institutional Review Board                   | 880 Kitakobayashi Mibumachi, Shimotsuga-gun, Tochigi, 321-0293, Japan   |
| 20170609     | 34006       | Iwate Medical University Uchimaru Medical Center | Iwate Medical University Hospital Institutional Review Board                    | 19-1 Uchimaru, Morioka-shi, Iwate, 020-8505, Japan                      |
| 20170609     | 34007       | Niwa Family Clinic                               | Medical Corporation Shintokai Yokohama Minoru Clinic Institutional Review Board | 1-13-8 Bessho Minami-ku, Yokohama-shi, Kanagawa, 232-0064, Japan        |
| 20170609     | 34008       | Osoegawa Neurology Clinic                        | Medical Corporation Shintokai Yokohama Minoru Clinic Institutional Review Board | 1-13-8 Bessho Minami-ku, Yokohama-shi, Kanagawa, 232-0064, Japan        |
| 20170609     | 34009       | Tanaka Neurosurgical Clinic                      | Medical Corporation Shintokai Yokohama Minoru Clinic Institutional Review Board | 1-13-8 Bessho Minami-ku, Yokohama-shi, Kanagawa, 232-0064, Japan        |
| 20170609     | 34010       | Tokyo Headache Clinic                            | Medical Corporation Shintokai Yokohama Minoru Clinic Institutional Review Board | 1-13-8 Bessho Minami-ku, Yokohama-shi, Kanagawa, 232-0064, Japan        |

|          |       |                                                    |                                                                                 |                                                                     |
|----------|-------|----------------------------------------------------|---------------------------------------------------------------------------------|---------------------------------------------------------------------|
| 20170609 | 34011 | Fujitsu Clinic                                     | Medical Corporation Shintokai Yokohama Minoru Clinic Institutional Review Board | 1-13-8 Bessho Minami-ku, Yokohama-shi, Kanagawa, 232-0064, Japan    |
| 20170609 | 34012 | Sendai Headache and Neurology Clinic               | Gshozuka Clinic Institutional Review Board                                      | 1-21-4 Gshozuka Miyamae-ku, Kawasaki-shi, Kanagawa, 216-0021, Japan |
| 20170609 | 34013 | Nagamitsu Clinic                                   | Gshozuka Clinic Institutional Review Board                                      | 1-21-4 Gshozuka Miyamae-ku, Kawasaki-shi, Kanagawa, 216-0021, Japan |
| 20170609 | 34014 | Nagaseki Headache Clinic                           | Medical Corporation Shintokai Yokohama Minoru Clinic Institutional Review Board | 1-13-8 Bessho Minami-ku, Yokohama-shi, Kanagawa, 232-0064, Japan    |
| 20170609 | 34015 | Negoro Neurology Clinic                            | Gshozuka Clinic Institutional Review Board                                      | 1-21-4 Gshozuka Miyamae-ku, Kawasaki-shi, Kanagawa, 216-0021, Japan |
| 20170609 | 34016 | Saino Clinic                                       | Gshozuka Clinic Institutional Review Board                                      | 1-21-4 Gshozuka Miyamae-ku, Kawasaki-shi, Kanagawa, 216-0021, Japan |
| 20170609 | 34017 | St Marianna University School of Medicine Hospital | St Marianna University Group Institutional Review Board                         | 2-16-1 Sugao Miyamae-ku, Kawasaki-shi, Kanagawa, 216-8511, Japan    |
| 20170609 | 34018 | Sakura Clinic                                      | Gshozuka Clinic Institutional Review Board                                      | 1-21-4 Gshozuka Miyamae-ku, Kawasaki-shi, Kanagawa, 216-0021, Japan |
| 20170609 | 34019 | Tatsuoka Neurology Clinic                          | Tatsuoka Neurology Clinic Institutional Review Board                            | 35-3 Chudojibojyocho Shimogyo-ku, Kyoto-shi, Kyoto, 600-8811, Japan |
| 20170609 | 34020 | Kitasato University Kitasato Institute Hospital    | The IRB of Kitasato University Shirokane Campus                                 | 5-9-1 Shirokane, Minato-ku, Tokyo, 108-8642, Japan                  |

1  
2  
3  
4  
5  
6  
7  
8  
9  
10  
11  
12  
13  
14  
15  
16  
17  
18  
19  
20  
21  
22  
23  
24  
25  
26  
27  
28  
29  
30  
31  
32  
33  
34  
35  
36  
37  
38  
39  
40  
41  
42  
43  
44  
45  
46  
47  
48  
49  
50  
51  
52  
53  
54  
55  
56  
57  
58  
59  
60

|          |       |                                    |                                                       |                                                  |
|----------|-------|------------------------------------|-------------------------------------------------------|--------------------------------------------------|
| 20170609 | 34021 | Tokai University Hachioji Hospital | Tokai University Hospitals Institutional Review Board | 1-2-5 Yoyogi, Shibuya-ku, Tokyo, 151-0053, Japan |
|----------|-------|------------------------------------|-------------------------------------------------------|--------------------------------------------------|

For peer review only

|          |       |                                      |                                                       |                                                                      |
|----------|-------|--------------------------------------|-------------------------------------------------------|----------------------------------------------------------------------|
| 20170609 | 34021 | Tokai University Hachioji Hospital   | Tokai University Hospitals Institutional Review Board | 143 Shimokasuya, Isehara-shi, Kanagawa, 259-1193, Japan              |
| 20170609 | 34021 | Tokai University Hachioji Hospital   | Tokai University Hospitals Institutional Review Board | 21-1 Gakkyo Oiso-machi, Naka-gun, Kanagawa, 259-0198, Japan          |
| 20170609 | 34021 | Tokai University Hachioji Hospital   | Tokai University Hospitals Institutional Review Board | 1838 Ishikawamachi, Hachioji-shi, Tokyo, 192-0032, Japan             |
| 20170609 | 34022 | Takase Internal Medicine Clinic      | Gshozuka Clinic Institutional Review Board            | 1-21-4 Gshozuka Miyamae-ku, Kawasaki-shi, Kanagawa, 216-0021, Japan  |
| 20170609 | 34023 | Tominaga Hospital                    | Tominaga Hospital Institutional Review Board          | 1-4-48 Minatomachi Naniwa-ku, Osaka-shi, Osaka, 556-0017, Japan      |
| 20170609 | 34024 | Konan Medical Center                 | Konan Medical Center IRB                              | 1-5-16 Kamokogahara Higashinada-ku, Kobe-shi, Hyogo, 658-0064, Japan |
| 20170609 | 34025 | Japanese Red Cross Shizuoka Hospital | Japanese Red Cross Shizuoka Hospital IRB              | 8-2 Otemachi Aoi-ku, Shizuoka-shi, Shizuoka, 420-0853, Japan         |

|          |       |                                          |                                                                                  |                                                                           |
|----------|-------|------------------------------------------|----------------------------------------------------------------------------------|---------------------------------------------------------------------------|
| 20170609 | 34026 | Nakamura Memorial Hospital               | Nakamura Memorial Hospital Nakamura Memorial Hospital Institutional Review Board | 14-291 Minami 1-jo Nishi, Chuo-ku, Sapporo-shi, Hokkaido, 060-8570, Japan |
| 20170609 | 34027 | Saitama Medical University Hospital      | Saitama Medical University Hospital Institutional Review Board                   | 38 Moroyamamachi Morohongo, Iruma-gun, Saitama, 350-0495, Japan           |
| 20170609 | 34028 | Sakuragi Headache Clinic                 | Saga Memorial Hospital Institutional Review Board                                | 1240-1 Nagase Takakise-machi, Saga-shi, Saga, 849-0917, Japan             |
| 20170609 | 34029 | Sapporo Isobe Headache and Memory Clinic | Sapporo Medical Associations Institutional Review Board                          | 19-1-1 Odorinishi Chuo-ku, Sapporo-shi, Hokkaido, 060-8581, Japan         |
| 20170609 | 34030 | Kokubu Clinic                            | Medical Corporation Shintokai Yokohama Minoru Clinic Institutional Review Board  | 1-13-8 Bessho Minami-ku, Yokohama-shi, Kanagawa, 232-0064, Japan          |
| 20170609 | 34031 | Umenotsuji Clinic                        | Medical Corporation Shintokai Yokohama Minoru Clinic Institutional Review Board  | 1-13-8 Bessho Minami-ku, Yokohama-shi, Kanagawa, 232-0064, Japan          |
| 20170609 | 34032 | Sanno Clinic Shinagawa                   | Shinagawa East One Medical Clinic Institutional Review Board                     | 2-16-1 Kounan, Shinagawa East One 3F, Minato-ku, Tokyo, 108-0075, Japan   |

|          |       |                                                      |                                                                                 |                                                                                 |
|----------|-------|------------------------------------------------------|---------------------------------------------------------------------------------|---------------------------------------------------------------------------------|
| 20170609 | 34033 | Ooba Clinic for Neurosurgery and Headache            | Nihonbashi Sakura Clinic Institutional Review Board                             | 1-9-2 Nihonbashikayabacho, Inamura Building 5F, Chuo-ku, Tokyo, 103-0025, Japan |
| 20170609 | 34034 | Doi Internal Medicine Neurology                      | Gshozuka Clinic Institutional Review Board                                      | 1-21-4 Gshozuka Miyamae-ku, Kawasaki-shi, Kanagawa, 216-0021, Japan             |
| 20170609 | 34035 | Ikeda Neurosurgical Clinic                           | Medical Corporation Shintokai Yokohama Minoru Clinic Institutional Review Board | 1-13-8 Bessho Minami-ku, Yokohama-shi, Kanagawa, 232-0064, Japan                |
| 20170609 | 34036 | Jinnouchi Neurosurgery Clinic                        | Medical Corporation Shintokai Yokohama Minoru Clinic Institutional Review Board | 1-13-8 Bessho Minami-ku, Yokohama-shi, Kanagawa, 232-0064, Japan                |
| 20170609 | 34037 | Kijima Neurosurgery Clinic                           | Gshozuka Clinic Institutional Review Board                                      | 1-21-4 Gshozuka Miyamae-ku, Kawasaki-shi, Kanagawa, 216-0021, Japan             |
| 20170609 | 34038 | Medical Corporation Yufukai Shimoda Neurology Clinic | Gshozuka Clinic Institutional Review Board                                      | 1-21-4 Gshozuka Miyamae-ku, Kawasaki-shi, Kanagawa, 216-0021, Japan             |



|          |       |                                                   |                                                                                 |                                                                                 |
|----------|-------|---------------------------------------------------|---------------------------------------------------------------------------------|---------------------------------------------------------------------------------|
| 20170609 | 34039 | Medical Corporation Seikokai Takanoko Hospital    | Medical Corporation Seikokai Takanoko Hospital Institutional Review Board       | 525-1 Takanokomachi, Matsuyama-shi, Ehime, 790-0925, Japan                      |
| 20170609 | 34040 | Medical Corporation Inoue Neurology Clinic        | Medical Corporation Shintokai Yokohama Minoru Clinic Institutional Review Board | 1-13-8 Bessho Minami-ku, Yokohama-shi, Kanagawa, 232-0064, Japan                |
| 20170609 | 34041 | Sakuma Neurological Clinic                        | Gshozuka Clinic Institutional Review Board                                      | 1-21-4 Gshozuka Miyamae-ku, Kawasaki-shi, Kanagawa, 216-0021, Japan             |
| 20170609 | 34042 | Higashi Sapporo Neurology and Neurosurgery Clinic | Nihonbashi Sakura Clinic Institutional Review Board                             | 1-9-2 Nihonbashikayabacho, Inamura Building 5F, Chuo-ku, Tokyo, 103-0025, Japan |

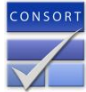

## CONSORT 2010 checklist of information to include when reporting a randomised trial\*

| Section/Topic             | Item No | Checklist item                                                                                                                        | Reported on page No                                                                                                      |
|---------------------------|---------|---------------------------------------------------------------------------------------------------------------------------------------|--------------------------------------------------------------------------------------------------------------------------|
| <b>Title and abstract</b> |         |                                                                                                                                       |                                                                                                                          |
|                           | 1a      | Identification as a randomised trial in the title                                                                                     | 1                                                                                                                        |
|                           | 1b      | Structured summary of trial design, methods, results, and conclusions (for specific guidance see CONSORT for abstracts)               | 2,3                                                                                                                      |
| <b>Introduction</b>       |         |                                                                                                                                       |                                                                                                                          |
| Background and objectives | 2a      | Scientific background and explanation of rationale                                                                                    | 4                                                                                                                        |
|                           | 2b      | Specific objectives or hypotheses                                                                                                     | 4                                                                                                                        |
| <b>Methods</b>            |         |                                                                                                                                       |                                                                                                                          |
| Trial design              | 3a      | Description of trial design (such as parallel, factorial) including allocation ratio                                                  | 5                                                                                                                        |
|                           | 3b      | Important changes to methods after trial commencement (such as eligibility criteria), with reasons                                    | NA                                                                                                                       |
| Participants              | 4a      | Eligibility criteria for participants                                                                                                 | 5,6                                                                                                                      |
|                           | 4b      | Settings and locations where the data were collected                                                                                  | 5                                                                                                                        |
| Interventions             | 5       | The interventions for each group with sufficient details to allow replication, including how and when they were actually administered | 5                                                                                                                        |
| Outcomes                  | 6a      | Completely defined pre-specified primary and secondary outcome measures, including how and when they were assessed                    | 6                                                                                                                        |
|                           | 6b      | Any changes to trial outcomes after the trial commenced, with reasons                                                                 | NA                                                                                                                       |
| Sample size               | 7a      | How sample size was determined                                                                                                        | NA; sample size was based on the number of patients who completed the DBTP and received at least one dose of erenumab 70 |

mg in the  
OLTP

NA

5

NA

NA

5

NA

NA; this is a  
single-arm  
open-label  
extension

7

NA

7, Figure S2

7, Figure S2

5

5

8

8

8,9, Figure 1,  
Figure 2

NA

1  
2  
3  
4  
5  
6  
7  
8  
9  
10  
11  
12  
13  
14  
15  
16  
17  
18  
19  
20  
21  
22  
23  
24  
25  
26  
27  
28  
29  
30  
31  
32  
33  
34  
35  
36  
37  
38  
39  
40  
41  
42  
43  
44  
45  
46

Randomisation:

Sequence

generation

Allocation

concealment

mechanism

Implementation

Blinding

Statistical methods

Results

Participant flow (a

diagram is strongly

recommended)

Recruitment

Baseline data

Numbers analysed

Outcomes and

estimation

Ancillary analyses

- 7b When applicable, explanation of any interim analyses and stopping guidelines
- 8a Method used to generate the random allocation sequence
- 8b Type of randomisation; details of any restriction (such as blocking and block size)
- 9 Mechanism used to implement the random allocation sequence (such as sequentially numbered containers), describing any steps taken to conceal the sequence until interventions were assigned
- 10 Who generated the random allocation sequence, who enrolled participants, and who assigned participants to interventions
- 11a If done, who was blinded after assignment to interventions (for example, participants, care providers, those assessing outcomes) and how
- 11b If relevant, description of the similarity of interventions
- 12a Statistical methods used to compare groups for primary and secondary outcomes
- 12b Methods for additional analyses, such as subgroup analyses and adjusted analyses
- 13a For each group, the numbers of participants who were randomly assigned, received intended treatment, and were analysed for the primary outcome
- 13b For each group, losses and exclusions after randomisation, together with reasons
- 14a Dates defining the periods of recruitment and follow-up
- 14b Why the trial ended or was stopped
- 15 A table showing baseline demographic and clinical characteristics for each group
- 16 For each group, number of participants (denominator) included in each analysis and whether the analysis was by original assigned groups
- 17a For each primary and secondary outcome, results for each group, and the estimated effect size and its precision (such as 95% confidence interval)
- 17b For binary outcomes, presentation of both absolute and relative effect sizes is recommended
- 18 Results of any other analyses performed, including subgroup analyses and adjusted analyses, distinguishing

|    |                          |                                                                                                                     |                                                      |
|----|--------------------------|---------------------------------------------------------------------------------------------------------------------|------------------------------------------------------|
| 1  |                          | pre-specified from exploratory                                                                                      | NA                                                   |
| 2  | Harms                    | 19 All important harms or unintended effects in each group (for specific guidance see CONSORT for harms)            | 10-12                                                |
| 3  | <b>Discussion</b>        |                                                                                                                     |                                                      |
| 4  | Limitations              | 20 Trial limitations, addressing sources of potential bias, imprecision, and, if relevant, multiplicity of analyses | 3                                                    |
| 5  | Generalisability         | 21 Generalisability (external validity, applicability) of the trial findings                                        | 12-13                                                |
| 6  | Interpretation           | 22 Interpretation consistent with results, balancing benefits and harms, and considering other relevant evidence    | 13                                                   |
| 7  | <b>Other information</b> |                                                                                                                     |                                                      |
| 8  | Registration             | 23 Registration number and name of trial registry                                                                   | 3                                                    |
| 9  | Protocol                 | 24 Where the full trial protocol can be accessed, if available                                                      | Protocol will<br>be provided<br>during<br>submission |
| 10 | Funding                  | 25 Sources of funding and other support (such as supply of drugs), role of funders                                  | 3                                                    |

18

19 \*We strongly recommend reading this statement in conjunction with the CONSORT 2010 Explanation and Elaboration for important clarifications on all the items. If relevant, we also

20 recommend reading CONSORT extensions for cluster randomised trials, non-inferiority and equivalence trials, non-pharmacological treatments, herbal interventions, and pragmatic trials.

21 Additional extensions are forthcoming: for those and for up to date references relevant to this checklist, see [www.consort-statement.org](http://www.consort-statement.org).

22

23

24

25

26

27

28

29

30

31

32

33

34

35

36

37

38

39

40

41

42

1  
2  
3 **Items to include when reporting a randomized trial in a journal or conference abstract**  
4  
5

| Item               | Description                                                                                                 | Reported on line number |
|--------------------|-------------------------------------------------------------------------------------------------------------|-------------------------|
| Title              | Identification of the study as randomized                                                                   | 2                       |
| Authors *          | Contact details for the corresponding author                                                                | 15,16                   |
| Trial design       | Description of the trial design (e.g. parallel, cluster, non-inferiority)                                   | 27                      |
| <b>Methods</b>     |                                                                                                             |                         |
| Participants       | Eligibility criteria for participants and the settings where the data were collected                        | 28-31                   |
| Interventions      | Interventions intended for each group                                                                       | 32                      |
| Objective          | Specific objective or hypothesis                                                                            | 24-26                   |
| Outcome            | Clearly defined primary outcome for this report                                                             | 33-36                   |
| Randomization      | How participants were allocated to interventions                                                            | NA                      |
| Blinding (masking) | Whether or not participants, care givers, and those assessing the outcomes were blinded to group assignment | NA                      |
| <b>Results</b>     |                                                                                                             |                         |
| Numbers randomized | Number of participants randomized to each group                                                             | 30                      |
| Recruitment        | Trial status                                                                                                | NA                      |
| Numbers analysed   | Number of participants analysed in each group                                                               | 30-31                   |
| Outcome            | For the primary outcome, a result for each group and the estimated effect size and its precision            | 37-42                   |
| Harms              | Important adverse events or side effects                                                                    | 43-45                   |
| Conclusions        | General interpretation of the results                                                                       | 46-48                   |
| Trial registration | Registration number and name of trial register                                                              | 49                      |
| Funding            | Source of funding                                                                                           | 50                      |

38  
39 *\*this item is specific to conference abstracts*  
40  
41  
42  
43  
44  
45  
46  
47  
48  
49  
50  
51  
52  
53  
54  
55  
56  
57  
58  
59  
60

# BMJ Open

## Long-term efficacy and safety of erenumab in Japanese patients with episodic and chronic migraine: Results from a 28-week open-label treatment period of a randomized trial

|                                 |                                                                                                                                                                                                                                                                                                                                                                                                                                                                                                                                                                                                                                      |
|---------------------------------|--------------------------------------------------------------------------------------------------------------------------------------------------------------------------------------------------------------------------------------------------------------------------------------------------------------------------------------------------------------------------------------------------------------------------------------------------------------------------------------------------------------------------------------------------------------------------------------------------------------------------------------|
| Journal:                        | <i>BMJ Open</i>                                                                                                                                                                                                                                                                                                                                                                                                                                                                                                                                                                                                                      |
| Manuscript ID                   | bmjopen-2022-068616.R1                                                                                                                                                                                                                                                                                                                                                                                                                                                                                                                                                                                                               |
| Article Type:                   | Original research                                                                                                                                                                                                                                                                                                                                                                                                                                                                                                                                                                                                                    |
| Date Submitted by the Author:   | 30-Jun-2023                                                                                                                                                                                                                                                                                                                                                                                                                                                                                                                                                                                                                          |
| Complete List of Authors:       | Hirata, Koichi; Dokkyo Ika Daigaku, Department of Neurology<br>Takeshima, Takao ; Tominaga Hospital, Headache Center, Department of Neurology<br>Sakai, Fumihiko ; Saitama Neuropsychiatric Institute, Saitama<br>International Headache Center<br>Numachi, Yotaro ; Amgen KK, Research & Development<br>Yoshida, Ryuji ; Amgen KK, Research & Development<br>Koukakis, Reija ; Amgen Ltd Uxbridge, Biostatistics<br>Hasebe, Miki; Amgen KK, Research & Development<br>Yui, Daishi ; Amgen KK, Research & Development<br>da Silva Lima, Gabriel Paiva ; Amgen Inc, Global Development<br>Cheng, Sunfa; Amgen Inc, Global Development |
| <b>Primary Subject Heading</b>: | Neurology                                                                                                                                                                                                                                                                                                                                                                                                                                                                                                                                                                                                                            |
| Secondary Subject Heading:      | Neurology, Pharmacology and therapeutics                                                                                                                                                                                                                                                                                                                                                                                                                                                                                                                                                                                             |
| Keywords:                       | NEUROLOGY, Adult neurology < NEUROLOGY, Migraine < NEUROLOGY, Neurological pain < NEUROLOGY, Clinical trials < THERAPEUTICS                                                                                                                                                                                                                                                                                                                                                                                                                                                                                                          |
|                                 |                                                                                                                                                                                                                                                                                                                                                                                                                                                                                                                                                                                                                                      |

SCHOLARONE™  
Manuscripts



I, the Submitting Author has the right to grant and does grant on behalf of all authors of the Work (as defined in the below author licence), an exclusive licence and/or a non-exclusive licence for contributions from authors who are: i) UK Crown employees; ii) where BMJ has agreed a CC-BY licence shall apply, and/or iii) in accordance with the terms applicable for US Federal Government officers or employees acting as part of their official duties; on a worldwide, perpetual, irrevocable, royalty-free basis to BMJ Publishing Group Ltd ("BMJ") its licensees and where the relevant Journal is co-owned by BMJ to the co-owners of the Journal, to publish the Work in this journal and any other BMJ products and to exploit all rights, as set out in our [licence](#).

The Submitting Author accepts and understands that any supply made under these terms is made by BMJ to the Submitting Author unless you are acting as an employee on behalf of your employer or a postgraduate student of an affiliated institution which is paying any applicable article publishing charge ("APC") for Open Access articles. Where the Submitting Author wishes to make the Work available on an Open Access basis (and intends to pay the relevant APC), the terms of reuse of such Open Access shall be governed by a Creative Commons licence – details of these licences and which [Creative Commons](#) licence will apply to this Work are set out in our licence referred to above.

Other than as permitted in any relevant BMJ Author's Self Archiving Policies, I confirm this Work has not been accepted for publication elsewhere, is not being considered for publication elsewhere and does not duplicate material already published. I confirm all authors consent to publication of this Work and authorise the granting of this licence.

1  
2  
3  
4 1 **Long-term efficacy and safety of erenumab in Japanese patients with episodic and**  
5  
6 2 **chronic migraine: Results from a 28-week open-label treatment period of a randomized**  
7  
8 3 **trial**  
9

10 4  
11  
12  
13 5 Koichi Hirata, MD, PhD,<sup>1</sup> Takao Takeshima, MD, PhD,<sup>2</sup> Fumihiko Sakai, MD, PhD,<sup>3</sup> Yotaro  
14  
15 6 Numachi, MD, PhD,<sup>4</sup> Ryuji Yoshida, PhD,<sup>4</sup> Reija Koukakis,<sup>5</sup> Miki Hasebe, PhD,<sup>4</sup> Daishi Yui,  
16  
17 7 PhD,<sup>4</sup> Gabriel Paiva da Silva Lima, MD,<sup>6</sup> Sunfa Cheng, MD<sup>6</sup>  
18

19  
20 8 <sup>1</sup>Department of Neurology, Dokkyo Medical University, Tochigi, Japan  
21

22  
23 9 <sup>2</sup>Headache Center, Department of Neurology, Tominaga Hospital, Osaka, Japan  
24

25  
26 10 <sup>3</sup>Saitama International Headache Center, Saitama, Japan  
27

28  
29 11 <sup>4</sup>Research & Development, Amgen K.K., Tokyo, Japan  
30

31  
32 12 <sup>5</sup>Biostatistics, Amgen Inc., Uxbridge, UK  
33

34  
35 13 <sup>6</sup>Global Development, Amgen Inc., Thousand Oaks, California, USA  
36

37 14 **Correspondence:**

38  
39  
40 15 Sunfa Cheng, Global Development, Amgen Inc., 1 Amgen Center Drive, Thousand Oaks,  
41  
42 16 California 91320, USA. Email: sunfac@amgen.com  
43

44  
45 17 **Keywords:** Erenumab, CGRP, Episodic migraine, Chronic migraine, Japanese patients  
46

47  
48 18 **Article type:** Original Research  
49

50  
51 19 **Word Count:** 2511 (limit 4000)  
52

53 20  
54

55  
56 21  
57



1  
2  
3 22 **ABSTRACT**  
4 23  
5

6 24 **Objectives:** To evaluate the 1-year efficacy and safety of once-monthly erenumab 70 mg  
7  
8 25 following a 24-week double-blind treatment period (DBTP) of a phase 3 randomized study of  
9  
10 26 Japanese patients with episodic migraine (EM) or chronic migraine (CM).

11  
12  
13 27 **Design:** Multicenter open-label study.  
14

15  
16 28 **Setting:** A total of 41 centers in Japan.  
17

18  
19 29 **Participants:** Patients completing the DBTP continued into the 28-week open-label treatment  
20  
21 30 period (OLTP). 254 of 261 (97.3%) randomized patients continued into the OLTP; 244 (93.5%)  
22  
23 31 completed treatment.  
24

25  
26 32 **Interventions:** Once monthly subcutaneous erenumab 70 mg.  
27

28  
29 33 **Main Outcome measures:** Changes from baseline in monthly migraine days (MMD) and  
30  
31 34 monthly acute migraine-specific medication treatment days (MSMD) reported via patient eDiary;  
32  
33 35 proportion of  $\geq 50\%$  and  $\geq 75\%$  responders in MMD reduction from baseline; incidence and  
34  
35 36 exposure-adjusted incidence of treatment-emergent adverse events (TEAEs).  
36

37  
38 37 **Results:** At week 24 of the DBTP, the mean (SE) change from baseline in MMD for the  
39  
40 38 erenumab group was  $-3.8$  (0.4) days (EM,  $-3.0$  [0.4]; CM,  $-5.2$  [0.8]); in MSMD,  $-2.6$  (0.4) days  
41  
42 39 (EM,  $-2.1$  [0.4]; CM,  $-3.4$  [0.7]). At the end of the OLTP (52 weeks postbaseline), the mean  
43  
44 40 (SE) change from baseline in MMD was  $-4.7$  (0.3) days (EM,  $-3.4$  [0.3]; CM,  $-6.9$  [0.6]); in  
45  
46 41 MSMD,  $-3.3$  (0.3) days (EM,  $-2.4$  [0.3]; CM,  $-4.6$  [0.5]). The proportion of  $\geq 50\%$  responders for  
47  
48 42 MMD reduction in the erenumab group was 34.1% at week 24; 44.4% at week 52. The  
49  
50 43 exposure-adjusted incidence of TEAEs was 219.7 per 100 patient-years during the OLTP  
51  
52 44 (DBTP, 251.0 for the erenumab group). The most common TEAEs during the OLTP were  
53  
54 45 nasopharyngitis, constipation, and influenza. No new safety concerns were identified.  
55  
56  
57  
58  
59  
60

1  
2  
3 46 **Conclusions:** Erenumab treatment was associated with reduced migraine frequency in  
4  
5 47 Japanese patients with EM or CM for up to 1 year. Overall safety results from the OLTP were  
6  
7 48 consistent with DBTP results.  
8  
9

10 49 **Clinical Trials Registration Number:** NCT03812224  
11  
12

13 50 **Funding:** This study was funded by Amgen.  
14  
15

### 16 51 **STRENGTHS AND LIMITATIONS OF THIS STUDY**

- 17 52 • While the 28-week OLTP was short relative to other studies in non-Japanese patients,  
18 53 this study represents the longest follow-up time with erenumab in Japanese patients with  
19 54 CM  
20 54
- 21 55
- 22 56 • Patients and study staff remained blinded to assignment (placebo or erenumab) in DBTP  
23 57 during OLTP  
24 58
- 25 59 • Reporting exposure-adjusted rates normalizes the rates of adverse events occurring  
26 60 during the DBTP and OLTP to equal exposure periods (ie, events per 100 patient-years),  
27 61 and thus allow for proper comparison between the DBTP and OLTP  
28 61  
29 62
- 30 63 • The OLTP of this study lacked a comparator arm  
31 63  
32 64  
33  
34  
35 65

## 66 INTRODUCTION

67 Migraine is a common neurological disease worldwide and a leading cause of disability  
68 associated with significant personal and societal effects.(1-3) In Japan, 6% to 8% of the  
69 population is affected by migraine, which places a substantial burden on patients and society  
70 related to quality of life, work productivity, and costs.(4-7) Because of concerns related to  
71 inadequate efficacy and poor tolerability, the use of standard of care oral preventive medications  
72 is low and is associated with high rates of discontinuation.(6, 8-11) Therefore, there is an unmet  
73 need for new migraine preventive medications.

74 Erenumab (erenumab-aooe in the United States), a fully human monoclonal antibody against  
75 the calcitonin gene-related peptide (CGRP) receptor, has been approved for the preventive  
76 treatment of adult migraine in over 70 countries worldwide, including the United States (2018),  
77 Europe (2018), and Japan (2021).(12, 13) The sustained efficacy and safety of erenumab in the  
78 preventive treatment of episodic migraine (EM) and chronic migraine (CM) have been  
79 demonstrated in several global clinical studies.(14-18) In Japan, approval was based on two  
80 clinical studies in adult patients with EM or CM, which demonstrated erenumab to be safe and  
81 efficacious.(19, 20) Sustained efficacy and safety of erenumab for up to 2 years in Japanese  
82 patients with EM have also been demonstrated.(21)

83 Here, we report on the long-term (up to 1 year) efficacy, safety, and tolerability of once-monthly  
84 erenumab 70 mg during a 28-week open-label treatment period (OLTP) after a 24-week double-  
85 blind treatment period (DBTP) of a phase 3 study, which demonstrated favorable efficacy and  
86 safety results for erenumab 70 mg in EM and CM.(20)

87

88

## 89 **METHODS**

### 91 **Study design**

92 This multicenter (41 centers across Japan), 28-week OLTP followed a 24-week, randomized,  
93 double-blind, placebo-controlled, phase 3 study of once-monthly erenumab 70 mg in patients  
94 with EM or CM in Japan (ClinicalTrials.gov identifier NCT03812224) (Figure S1). Patients who  
95 completed the DBTP in each treatment group were eligible to participate in the OLTP and  
96 receive once-monthly erenumab 70 mg. The first patient entered the OLTP on October 2, 2019,  
97 and the last patient ended the OLTP on November 20, 2020. Randomization was stratified by  
98 migraine status (EM or CM) and migraine preventive treatment status (ever used or never used)  
99 and was assigned by the sponsor using an interactive response technology system. During the  
100 DBTP, patients received once-monthly erenumab 70 mg or placebo in a 1:1 ratio; in the OLTP,  
101 all patients received once-monthly erenumab 70 mg. Independent ethics committee or  
102 institutional review boards at each site (Table S1) reviewed and approved the protocol and  
103 signed the informed patient consent forms before study initiation. The study conforms to the  
104 guidelines set by the International Council for Harmonisation for Good Clinical Practice and by  
105 the Pharmaceuticals and Medical Devices Agency (PMDA). The study was designed according  
106 to the European Medicines Agency (EMA) guideline on Clinical Investigation of Medicinal  
107 Products for the Treatment of Migraine, the International Headache Society (IHS) Guidelines for  
108 Controlled Trials of Drugs in Migraine, and advice given by the PMDA.(22, 23)

### 109 **Patient and Public Involvement Statement**

110 No patients or public representatives were involved in the design, conduct, reporting, or  
111 dissemination efforts of the study results.

### 112 **Patients**

1  
2  
3 113 Patients who completed the DBTP (parent study) in each treatment group were eligible to  
4  
5 114 participate in the OLTP and receive once-monthly erenumab 70 mg. Japanese patients aged 20  
6  
7 115 through 65 years with a history of migraine with or without aura (based on medical records or  
8  
9 116 patient self-report) for at least 12 months before screening, as defined in the third edition of the  
10  
11 117 *International Classification of Headache Disorders* (ICHD-3) of the IHS, and a diagnosis of EM  
12  
13 118 (<15 headache days/month,  $\geq 4$  monthly migraine days [MMD]) or CM ( $\geq 15$  headache  
14  
15 119 days/month,  $\geq 8$  MMD) over the 3 months before screening, were included. Patients had to  
16  
17 120 demonstrate at least 80% compliance with the eDiary during the baseline period prior to the  
18  
19 121 DBTP. A detailed description of the eligibility criteria in the parent study has been described  
20  
21 122 previously.<sup>(20)</sup>

### 25 123 **Endpoints and assessments**

26 124 Efficacy outcomes during the OLTP included changes from baseline in MMD and monthly acute  
27  
28 125 migraine-specific medication treatment days (MSMD), and the proportion of patients who  
29  
30 126 achieved at least a 50% or 75% reduction in MMD from baseline.

31  
32  
33 127 Patients used an eDiary to report clinical outcome assessments daily during weeks 33 to 36 and  
34  
35 128 weeks 49 to 52. Clinical outcome assessments included the date and time of headache start  
36  
37 129 and end; the worst pain severity of the headache; pain features (e.g., one-sided, throbbing,  
38  
39 130 worsens with exercise/physical activity); associated symptoms (e.g., aura, nausea, vomiting,  
40  
41 131 photophobia, phonophobia), and use of acute headache medications. A migraine day was  
42  
43 132 defined as a migraine (with or without aura) that lasted for at least 4 hours and had at least two  
44  
45 133 of the following pain features: unilateral, throbbing, moderate to severe, or exacerbated with  
46  
47 134 exercise or physical activity; or was associated with nausea, vomiting, or photophobia and  
48  
49 135 phonophobia. A migraine day also included a day in which a patient took a migraine-specific  
50  
51 136 medication during aura or to treat a headache regardless of the duration and associated  
52  
53 137 symptoms. A qualified headache day was a day characterized by onset, continuation, or  
54  
55  
56  
57  
58  
59  
60

1  
2  
3 138 recurrence of a headache and met one of the following criteria: a migraine headache treated  
4  
5 139 with acute migraine-specific medication, a non-migraine headache that lasted for at least 4  
6  
7 140 hours, or a headache for which acute headache treatment was used. An acute migraine-specific  
8  
9 141 medication treatment day was defined as any day during which migraine-specific medication  
10  
11 142 was used.

13  
14 143 Safety endpoints included the incidence and exposure-adjusted incidence of treatment-  
15  
16 144 emergent adverse events (TEAEs), clinical laboratory values and vital signs, and the incidence  
17  
18 145 of anti-erenumab antibodies. Exposure-adjusted rates (per 100 patient-years) were calculated  
19  
20 146 by dividing the number of patients with at least one reported occurrence of the TEAE of interest  
21  
22 147 by the total time at risk for reporting the TEAE (patient-year) multiplied by 100. The time at risk  
23  
24 148 was defined as the time from the first dose of erenumab to the onset of the TEAE or the end of  
25  
26 149 study date. Reporting exposure-adjusted rates normalizes the rates of adverse events occurring  
27  
28 150 during the DBTP and OLTP to equal exposure periods (ie, events per 100 patient-years), and  
29  
30 151 thus allows for a proper comparison between the DBTP and OLTP.

### 31 152 **Statistical analysis**

32  
33  
34 153 Analysis was performed after all patients had completed safety follow-up at the end of the study  
35  
36 154 and included patients who received at least one dose of erenumab 70 mg in the OLTP. Efficacy  
37  
38 155 and safety data were tabulated by the double-blind treatment group. Efficacy endpoints were  
39  
40 156 analyzed by using descriptive statistics based on observed data without imputation and were  
41  
42 157 tabulated by visit. No formal testing was conducted. Patient incidence and exposure-adjusted  
43  
44 158 incidence of TEAEs were tabulated by treatment group and by system organ class and  
45  
46 159 preferred term. All analyses were performed using SAS System 9.4 (SAS Institute, Cary, NC,  
47  
48 160 USA).

## 49 161 **RESULTS**

50  
51  
52  
53  
54 162

## 163 Patients

164 Of the 261 patients enrolled and randomized in the parent study (erenumab 70 mg, n = 130;  
 165 placebo, n = 131), 254 (97.3%) entered the OLTP and received at least one dose of the  
 166 investigational product (IP) and 244 (93.5%) completed the IP. Ten patients (3.8%) discontinued  
 167 the IP for the following reasons: patient request (n = 4; 1.5%), COVID-19 control measures (n =  
 168 4; 1.5%), adverse event (n = 1; 0.4%), and pregnancy (n = 1; 0.4%) (Figure S2). In the OLTP  
 169 population, the mean age of patients was 44.3 years, 86.6% were female, and the majority  
 170 (77.6%) had used or were using migraine preventive treatment at baseline (Table 1).

171 **Table 1.** Baseline demographics and characteristics of the OLTP population

|                                                  | <b>Total<br/>(N = 254)</b> |
|--------------------------------------------------|----------------------------|
| Age, mean (SD), years                            | 44.3 (9.0)                 |
| Sex, female, n (%)                               | 220 (86.6)                 |
| Migraine type*, n (%)                            |                            |
| EM                                               | 155 (61.0)                 |
| CM                                               | 99 (39.0)                  |
| Migraine preventive treatment use, n (%)         |                            |
| Ever used (including prior and/or current users) | 197 (77.6)                 |
| Never used                                       | 57 (22.4)                  |
| MMD, mean (SE)                                   | 12.2 (0.4)                 |
| MSMD, mean (SE)                                  | 9.4 (0.4)                  |
| MHD, mean (SE)                                   | 13.8 (0.4)                 |

172 \*Based on actual data collected instead of randomization stratification. N = number of patients  
 173 in the analysis set. n = number of patients with observed data. CM, chronic migraine; EM,  
 174 episodic migraine; MHD, monthly headache days; MMD, monthly migraine days; MSMD,  
 175 monthly acute migraine-specific medication treatment days; OLTP, open-label treatment period;  
 176 SD, standard deviation; SE, standard error of the mean.

## 177 Efficacy

1  
2  
3 178 In the OLTP population (N = 254; EM, n = 155; CM, n = 99), the mean (standard error of the  
4  
5 179 mean [SE]) MMD at baseline was 12.2 (0.4) days (EM, 8.3 [0.2] days; CM, 18.2 [0.4] days) and  
6  
7 180 the mean (SE) MSMD was 9.4 (0.4) days (EM, 6.8 [0.3] days; CM, 13.6 [0.6] days) (Table 1). At  
8  
9 181 the end of the DBTP at week 24, the mean (SE) change from baseline in MMD for the  
10  
11 182 erenumab 70 mg group was -3.8 (0.4) days (EM, -3.0 [0.4] days; CM, -5.2 [0.8] days) and -  
12  
13 183 1.7 (0.5) days for the placebo group; at the end of the OLTP at week 52, the mean (SE) change  
14  
15 184 was -4.7 (0.3) days (EM, -3.4 [0.3]; CM, -6.9 [0.6]) (Figure 1, Table 2).

16  
17  
18 185 At the end of the DBTP at week 24, the mean (SE) change from baseline in MSMD for the  
19  
20 186 erenumab 70 mg group was -2.6 (0.4) days (EM, -2.1 [0.4]; CM, -3.4 [0.7]) and -0.7 (0.4) days  
21  
22 187 for the placebo group; at the end of the OLTP at week 52, the mean (SE) change was -3.3 (0.3)  
23  
24 188 days (EM, -2.4 [0.3] days; CM, -4.6 [0.5] days) (Figure 1, Table 2). Throughout the 28-week  
25  
26 189 OLTP, erenumab 70 mg demonstrated persistent efficacy in MMD and MSMD reduction in  
27  
28 190 patients with EM or CM.

29  
30  
31 191 At week 24 of the DBTP, the proportion of patients who achieved at least a 50% reduction in  
32  
33 192 MMD from baseline was 34.1% with erenumab 70 mg (EM, 39.7%; CM, 25.5%) and 19.1% with  
34  
35 193 placebo (Figure 2, Table 2). The response was maintained and numerically higher throughout  
36  
37 194 the OLTP than it was during the DBTP. At week 36 of the OLTP, 52.8% of the patients achieved  
38  
39 195 the 50% threshold for MMD reduction (EM, 58.8%; CM, 43.0%); at week 52, it was 44.4% (EM,  
40  
41 196 46.3%; CM, 41.7%). The results were similar for patients responding at the 75% threshold for  
42  
43 197 MMD reduction (Figure 2).

44  
45  
46  
47  
48 198 **Table 2.** Efficacy results during the OLTP

|                                               | EM<br>(N = 155) | CM<br>(N = 99) | Total<br>(N = 254) |
|-----------------------------------------------|-----------------|----------------|--------------------|
| <b>Change from baseline in MMD, mean (SE)</b> |                 |                |                    |
|                                               | n = 78          | n = 51         | n = 129            |
| Week 24*                                      | -3.0 (0.4)      | -5.2 (0.8)     | -3.8 (0.4)         |



|         |            |            |            |
|---------|------------|------------|------------|
|         | n = 153    | n = 93     | n = 246    |
| Week 36 | -3.7 (0.3) | -8.0 (0.6) | -5.3 (0.3) |

|         |            |            |            |
|---------|------------|------------|------------|
|         | n = 147    | n = 96     | n = 243    |
| Week 52 | -3.4 (0.3) | -6.9 (0.6) | -4.7 (0.3) |

### Change from baseline in MSMD, mean (SE)

|          |            |            |            |
|----------|------------|------------|------------|
|          | n = 78     | n = 51     | n = 129    |
| Week 24* | -2.1 (0.4) | -3.4 (0.7) | -2.6 (0.4) |

|         |            |            |            |
|---------|------------|------------|------------|
|         | n = 153    | n = 93     | n = 246    |
| Week 36 | -2.8 (0.3) | -5.2 (0.5) | -3.7 (0.3) |

|         |            |            |            |
|---------|------------|------------|------------|
|         | n = 147    | n = 96     | n = 243    |
| Week 52 | -2.4 (0.3) | -4.6 (0.5) | -3.3 (0.3) |

### Achievement of $\geq 50\%$ MMD response, n (%)

|          |           |           |           |
|----------|-----------|-----------|-----------|
|          | n = 78    | n = 51    | n = 129   |
| Week 24* | 31 (39.7) | 13 (25.5) | 44 (34.1) |

|         |           |           |            |
|---------|-----------|-----------|------------|
|         | n = 153   | n = 93    | n = 246    |
| Week 36 | 90 (58.8) | 40 (43.0) | 130 (52.8) |

|         |           |           |            |
|---------|-----------|-----------|------------|
|         | n = 147   | n = 96    | n = 243    |
| Week 52 | 68 (46.3) | 40 (41.7) | 108 (44.4) |

199 Efficacy by EM and CM subgroups at week 24 of the DBTP and during the OLTP. \*Data are

200 shown for patients in the erenumab 70 mg group at week 24 of the DBTP in the efficacy

201 analysis set. N = number of patients in the open-label analysis set; n = number of patients with

202 observed data. CM, chronic migraine; DBTP, double-blind treatment period; EM, episodic

203 migraine; MMD, monthly migraine days; MSMD, monthly acute migraine-specific medication

204 treatment days; OLTP, open-label treatment period; SE, standard error of the mean.

205

### 206 Safety

207 The mean (standard deviation) exposure to erenumab 70 mg during the OLTP was 192.6 (20.0)

208 days (total exposure to open-label treatment, 133.9 patient-years). The majority of patients

209 (92.1%) received all seven doses of erenumab 70 mg during the OLTP.

210 During the OLTP, the incidence of TEAEs was 71.3% (181/254) (Table 3). The exposure-  
 211 adjusted incidence of TEAEs during the OLTP was 219.7 per 100 patient-years, which is similar  
 212 to that in the erenumab group (251.0 per 100 patient-years) and in the placebo group (197.7 per  
 213 100 patient-years) during the DBTP. The majority of patients (62.2% [158/254]) experienced  
 214 TEAEs of grade 2 or less. The most common ( $\geq 5$  per 100 patient-years) TEAEs reported with  
 215 erenumab (OLTP vs DBTP) were nasopharyngitis (32.8 vs 67.2 per 100 patient-years),  
 216 constipation (7.8 vs 10.3 per 100 patient-years), influenza (6.6 vs 1.7 per 100 patient-years),  
 217 gastroenteritis (6.5 vs 6.8 per 100 patient-years), and urticaria (5.9 vs 1.7 per 100 patient-  
 218 years). Seven patients (2.8%) reported serious adverse events with erenumab during the OLTP,  
 219 corresponding to an exposure-adjusted rate of 4.1 per 100 patient-years, which is similar to the  
 220 rate reported during the DBTP in each treatment group (3.4 per 100 patient-years). During the  
 221 OLTP, one patient with a serious adverse event discontinued treatment because of a grade 3  
 222 serious adverse event of drug eruption, which was considered by the investigator to be  
 223 unrelated to erenumab treatment. No deaths were reported during the study. No clinically  
 224 significant changes in laboratory values or vital signs were observed throughout the OLTP.

225 Of the 254 patients in the OLTP, nine (3.5%) developed anti-erenumab binding antibodies for  
 226 the first time (negative or no result before the first OLTP dose), which is consistent with that  
 227 observed during the DBTP (5.4%) (Table 3). Of the nine patients who were positive for binding  
 228 antibodies during the OLTP, six received placebo during the DBTP and three received  
 229 erenumab during the DBTP and the OLTP. During the entire study, 16 patients (6.3%)  
 230 developed anti-erenumab binding antibodies after erenumab treatment, of which 6 (37.5%) had  
 231 transient antibodies (negative result at the last assessment). No patients developed anti-  
 232 erenumab neutralizing antibodies.

233 **Table 3.** Safety results during the DBTP and OLTP

|  | DBTP | OLTP |
|--|------|------|
|--|------|------|

|                                                 | Placebo<br>(N = 131) | Erenumab 70 mg<br>(N = 130) | Total<br>(N = 254)  |
|-------------------------------------------------|----------------------|-----------------------------|---------------------|
| All TEAEs, n (%) [r]                            | 78 (59.5) [197.7]    | 86 (66.2) [251.0]           | 181 (71.3) [219.7]  |
| Grade ≥2                                        | 67 (51.1) [159.2]    | 72 (55.4) [180.6]           | 158 (62.2) [159.9]  |
| Grade ≥3                                        | 2 (1.5) [3.4]        | 4 (3.1) [6.8]               | 12 (4.7) [7.1]      |
| Serious AEs                                     | 2 (1.5) [3.4]        | 2 (1.5) [3.4]               | 7 (2.8) [4.1]       |
| Leading to IP discontinuation                   | 0 (0.0) [0.0]        | 0 (0.0) [0.0]               | 1 (0.4) [0.6]       |
| Fatal AEs                                       | 0 (0.0) [0.0]        | 0 (0.0) [0.0]               | 0 (0.0) [0.0]       |
| Most common TEAEs, n (%) [r]*                   |                      |                             |                     |
| Nasopharyngitis                                 | 37 (28.2) [74.4]     | 35 (26.9) [67.2]            | 49 (19.3) [32.8]    |
| Constipation                                    | 1 (0.8) [1.7]        | 6 (4.6) [10.3]              | 13 (5.1) [7.8]      |
| Influenza                                       | 2 (1.5) [3.4]        | 1 (0.8) [1.7]               | 11 (4.3) [6.6]      |
| Gastroenteritis                                 | 4 (3.1) [6.7]        | 4 (3.1) [6.8]               | 11 (4.3) [6.5]      |
| Urticaria                                       | 0 (0.0) [0.0]        | 1 (0.8) [1.7]               | 10 (3.9) [5.9]      |
| Developed anti-erenumab antibodies, n (%)       |                      |                             |                     |
| Developed binding anti-erenumab antibodies      | NA                   | n' = 129<br>7 (5.4)         | n' = 254<br>9 (3.5) |
| Transient†                                      | NA                   | 2 (28.6)                    | 4 (44.4)            |
| Developed neutralizing anti-erenumab antibodies | NA                   | NA                          | NA                  |

234 \*Exposure-adjusted rates of TEAEs of at least 5 per 100 patient-years during the OLTP. †A  
235 negative result was reported at the patient's last time point within the study period. N = number  
236 of patients in the analysis set; n = number of patients with at least one occurrence of a TEAE or  
237 number of patients who developed anti-erenumab antibodies; n' = patients with a postbaseline  
238 result during the DBTP or OLTP; r = exposure-adjusted patient incidence rate per 100 patient-  
239 years. AE, adverse event; DBTP, double-blind treatment period; IP, investigational product; NA,  
240 not applicable; OLTP, open-label treatment period; TEAE, treatment-emergent adverse event.

## 241 **DISCUSSION**

242 The results of this 28-week OLTP study of erenumab 70 mg in Japanese patients with EM or  
243 CM demonstrated a persistence of efficacy for up to 1 year and a safety profile similar to that  
244 reported during the DBTP. From week 24 of the DBTP to the end of the OLTP at week 52, the  
245 reduction from baseline in MMD and MSMD, and the proportion of  $\geq 50\%$  and  $\geq 75\%$  responders  
246 in MMD reduction were maintained.

247 The incidence and exposure-adjusted incidence of TEAEs during the OLTP were consistent  
248 with those from the DBTP and previous studies,(18, 20, 21) except for influenza and urticaria,  
249 which were numerically higher during the OLTP than they were during the DBTP. Furthermore,  
250 although the exposure-adjusted rates of constipation during the OLTP (7.8 per 100 patient-  
251 years) were consistent with those during the DBTP (10.0 per 100 patient-years), they were  
252 higher than those reported during the OLTP of the phase 2 study in Japanese patients with EM  
253 (2.6 per 100 patient-years).(21) The development of anti-erenumab antibodies in 6.3% patients  
254 over the entire study was consistent with the 5.8% seen in the global CM OLE study and was  
255 lower than the 13.1% in the global EM OLE study.(24, 25) Neutralizing antibodies were  
256 uncommon in the global studies and were not observed in this study. In addition, no new safety  
257 concerns regarding clinically relevant changes in laboratory assessments and vital signs were  
258 identified throughout the OLTP. Of the patients who entered the OLTP, 3.9% discontinued IP  
259 including 1 for an AE. The high proportion of patients completing erenumab treatment through  
260 both DBTP and OLTP (93.5%) reflects the excellent tolerability and sustained efficacy. In the  
261 pivotal topiramate trials, 28.7% of participants withdrew during the 8-month OLE, more than  
262 40% of these due to AEs.(26) The high retention rate also reduces the potential for bias that  
263 may be seen in open-label extension studies where patients may drop out for diminished  
264 efficacy, thus skewing the efficacy results over time.

1  
2  
3 265 The OLTP of this study was non-randomized and lacked a comparator arm, thus limiting the  
4  
5 266 ability to distinguish study drug specific effects on efficacy and safety from other factors. In  
6  
7 267 addition, the duration of the 28-week OLTP was short relative to some other studies in non-  
8  
9 268 Japanese patients.(18) However, the study does represent the longest follow-up experience  
10  
11 269 with erenumab in Japanese patients with CM and shows long-term efficacy and safety that are  
12  
13 270 comparable to that seen in a global long-term study of erenumab in patients with CM.(25) In the  
14  
15 271 global CM study, the reduction in MMD and MSMD after 52 weeks for the erenumab 70 mg  
16  
17 272 group was -7.8 days and -5.8 days, respectively; 47.4% of the patients achieved at least a 50%  
18  
19 273 reduction from baseline in MMD. In the global EM study, the reduction in MMD and MSMD after  
20  
21 274 the 52-week open-label period (study week 64) for the erenumab 70 mg group was -5.0 days  
22  
23 275 and -2.4, respectively; 65% of the patients achieved at least a 50% reduction from baseline in  
24  
25 276 MMD.(24) This is comparable to the reductions in MMD and MSMD in this study at overall week  
26  
27 277 52 of -4.74 days and -3.26, respectively; 44.4% of the patients achieved at least a 50%  
28  
29 278 reduction from baseline in MMD. These data support long-term treatment with erenumab in  
30  
31 279 Japanese patients with EM and CM.  
32  
33  
34  
35

## 36 280 **CONCLUSION**

37  
38 281 Treatment with erenumab was associated with a reduction in migraine frequency that was  
39  
40 282 maintained for up to 1 year in Japanese patients with EM or CM. Erenumab had a safety profile  
41  
42 283 similar to that observed in the DBTP; no new safety signals were identified during the OLTP.  
43  
44

## 45 284 **Ethics Approval**

46  
47 285 This study involved human patients and was approved by ethics committees and institutional  
48  
49 286 review boards listed in the supplementary appendix (Table S1).  
50  
51  
52  
53  
54  
55  
56  
57  
58  
59  
60

## 287 **Acknowledgments**

288 Erenumab is codeveloped by Amgen and Novartis. The authors thank the patients and all the  
289 investigators who participated in this study. Medical writing support was provided by Qais Al-  
290 Hadid, PhD (Amgen). Editorial support was provided by Sangeeta P.C. (Cactus  
291 Communications).

## 292 **Author contributions**

293 SC and GPL contributed to the conception and design of the study and acquired the data. KH,  
294 TT, FS, YN, RY, RK, MH, DY, GPL, and SC analyzed and interpreted the data, drafted the  
295 manuscript, critically reviewed and revised the manuscript for intellectual content, and provided  
296 final approval of the version to be published.

## 297 **Conflict of Interest Statement**

298 KH reports royalties from Amgen, Astellas, Daiichi Sankyo, Eisai, Merck Sharp & Dohme, and  
299 Pfizer. TT has nothing to disclose. FS reports consulting fees from Amgen. RY, RK, MH, DY,  
300 GPL, and SC are employees of and own stock in Amgen. YN owns stock in Amgen.

## 301 **Institutional review board approval**

302 The Institutional review boards at each study center (Table S1) approved the study protocol,  
303 informed consent forms, and any materials provided to the patients.

## 304 **Data availability statement**

305 Qualified researchers may request data from Amgen clinical studies. Complete details are  
306 available at the following: [https://wwwext.amgen.com/science/clinical-trials/clinical-data-](https://wwwext.amgen.com/science/clinical-trials/clinical-data-transparency-practices/clinical-trial-data-sharing-request)  
307 [transparency-practices/clinical-trial-data-sharing-request](https://wwwext.amgen.com/science/clinical-trials/clinical-data-transparency-practices/clinical-trial-data-sharing-request).

308 **Funding:** This study was funded by Amgen. No grants or awards were used for funding of this  
309 study.

1  
2  
3  
4  
5  
6  
7  
8  
9  
10  
11  
12  
13  
14  
15  
16  
17  
18  
19  
20  
21  
22  
23  
24  
25  
26  
27  
28  
29  
30  
31  
32  
33  
34  
35  
36  
37  
38  
39  
40  
41  
42  
43  
44  
45  
46  
47  
48  
49  
50  
51  
52  
53  
54  
55  
56  
57  
58  
59  
60

310

For peer review only

311 **REFERENCES**

- 312
- 313 1. Lipton RB, Bigal ME, Diamond M, Freitag F, Reed ML, Stewart WF, et al. Migraine  
314 prevalence, disease burden, and the need for preventive therapy. *Neurology*. 2007;68(5):343-9.
- 315 2. Stovner L, Hagen K, Jensen R, Katsarava Z, Lipton R, Scher A, et al. The global burden  
316 of headache: a documentation of headache prevalence and disability worldwide. *Cephalalgia*.  
317 2007;27(3):193-210.
- 318 3. Agosti R. Migraine Burden of Disease: From the Patient's Experience to a Socio-  
319 Economic View. *Headache*. 2018;58 Suppl 1:17-32.
- 320 4. Sakai F, Igarashi H. Prevalence of migraine in Japan: a nationwide survey. *Cephalalgia*.  
321 1997;17(1):15-22.
- 322 5. Takeshima T, Ishizaki K, Fukuhara Y, Ijiri T, Kusumi M, Wakutani Y, et al. Population-  
323 based door-to-door survey of migraine in Japan: the Daisen study. *Headache*. 2004;44(1):8-19.
- 324 6. Hirata K, Ueda K, Komori M, Zagar AJ, Selzler KJ, Nelson AM, et al. Comprehensive  
325 population-based survey of migraine in Japan: results of the Observational Survey of the  
326 Epidemiology, tReatment, and Care Of Migraine (OVERCOME [Japan]) study. *Curr Med Res*  
327 *Opin*. 2021;37(11):1945-55.
- 328 7. Kikui S, Chen Y, Todaka H, Asao K, Adachi K, Takeshima T. Burden of migraine among  
329 Japanese patients: a cross-sectional National Health and Wellness Survey. *J Headache Pain*.  
330 2020;21(1):110.
- 331 8. Meyers JL, Davis KL, Lenz RA, Sakai F, Xue F. Treatment patterns and characteristics  
332 of patients with migraine in Japan: A retrospective analysis of health insurance claims data.  
333 *Cephalalgia*. 2019;39(12):1518-34.
- 334 9. Blumenfeld AM, Bloudek LM, Becker WJ, Buse DC, Varon SF, Maglinte GA, et al.  
335 Patterns of use and reasons for discontinuation of prophylactic medications for episodic



- 1  
2  
3 336 migraine and chronic migraine: results from the second international burden of migraine study  
4  
5 337 (IBMS-II). *Headache*. 2013;53(4):644-55.  
6  
7 338 10. Hepp Z, Bloudek LM, Varon SF. Systematic review of migraine prophylaxis adherence  
8  
9 339 and persistence. *J Manag Care Pharm*. 2014;20(1):22-33.  
10  
11 340 11. Hepp Z, Dodick DW, Varon SF, Gillard P, Hansen RN, Devine EB. Adherence to oral  
12  
13 341 migraine-preventive medications among patients with chronic migraine. *Cephalalgia*.  
14  
15 342 2015;35(6):478-88.  
16  
17 343 12. Aimovig (erenumab-aooe). Full Prescribing Information, Amgen, Inc., Thousand Oaks,  
18  
19 344 CA, 2020.  
20  
21 345 13. Aimovig (erenumab). Summary of Product Characteristics. Dublin, Ireland: Novartis  
22  
23 346 Europharm Limited; 2018.  
24  
25 347 14. Sun H, Dodick DW, Silberstein S, Goadsby PJ, Reuter U, Ashina M, et al. Safety and  
26  
27 348 efficacy of AMG 334 for prevention of episodic migraine: a randomised, double-blind, placebo-  
28  
29 349 controlled, phase 2 trial. *Lancet Neurol*. 2016;15(4):382-90.  
30  
31 350 15. Tepper S, Ashina M, Reuter U, Brandes JL, Dolezil D, Silberstein S, et al. Safety and  
32  
33 351 efficacy of erenumab for preventive treatment of chronic migraine: a randomised, double-blind,  
34  
35 352 placebo-controlled phase 2 trial. *Lancet Neurol*. 2017;16(6):425-34.  
36  
37 353 16. Goadsby PJ, Reuter U, Hallstrom Y, Broessner G, Bonner JH, Zhang F, et al. A  
38  
39 354 Controlled Trial of Erenumab for Episodic Migraine. *N Engl J Med*. 2017;377(22):2123-32.  
40  
41 355 17. Dodick DW, Ashina M, Brandes JL, Kudrow D, Lanteri-Minet M, Osipova V, et al. ARISE:  
42  
43 356 A Phase 3 randomized trial of erenumab for episodic migraine. *Cephalalgia*. 2018;38(6):1026-  
44  
45 357 37.  
46  
47 358 18. Ashina M, Goadsby PJ, Reuter U, Silberstein S, Dodick DW, Xue F, et al. Long-term  
48  
49 359 efficacy and safety of erenumab in migraine prevention: Results from a 5-year, open-label  
50  
51 360 treatment phase of a randomized clinical trial. *Eur J Neurol*. 2021;28(5):1716-25.  
52  
53  
54  
55  
56  
57  
58  
59  
60

- 1  
2  
3 361 19. Sakai F, Takeshima T, Tatsuoka Y, Hirata K, Lenz R, Wang Y, et al. A Randomized  
4  
5 362 Phase 2 Study of Erenumab for the Prevention of Episodic Migraine in Japanese Adults.  
6  
7 363 Headache. 2019;59(10):1731-42.  
8  
9 364 20. Takeshima T, Sakai F, Hirata K, Imai N, Matsumori Y, Yoshida R, et al. Erenumab  
10  
11 365 treatment for migraine prevention in Japanese patients: Efficacy and safety results from a  
12  
13 366 Phase 3, randomized, double-blind, placebo-controlled study. Headache. 2021;61(6):927-35.  
14  
15 367 21. Sakai F, Takeshima T, Tatsuoka Y, Hirata K, Cheng S, Numachi Y, et al. Long-term  
16  
17 368 efficacy and safety during open-label erenumab treatment in Japanese patients with episodic  
18  
19 369 migraine. Headache. 2021;61(4):653-61.  
20  
21 370 22. Tassorelli C, Diener HC, Dodick DW, Silberstein SD, Lipton RB, Ashina M, et al.  
22  
23 371 Guidelines of the International Headache Society for controlled trials of preventive treatment of  
24  
25 372 chronic migraine in adults. Cephalalgia. 2018;38(5):815-32.  
26  
27 373 23. Tfelt-Hansen P, Pascual J, Ramadan N, Dahlof C, D'Amico D, Diener HC, et al.  
28  
29 374 Guidelines for controlled trials of drugs in migraine: third edition. A guide for investigators.  
30  
31 375 Cephalalgia. 2012;32(1):6-38.  
32  
33 376 24. Ashina M, Dodick D, Goadsby PJ, Reuter U, Silberstein S, Zhang F, et al. Erenumab  
34  
35 377 (AMG 334) in episodic migraine: Interim analysis of an ongoing open-label study. Neurology.  
36  
37 378 2017;89(12):1237-43.  
38  
39 379 25. Tepper SJ, Ashina M, Reuter U, Brandes JL, Dolezil D, Silberstein SD, et al. Long-term  
40  
41 380 safety and efficacy of erenumab in patients with chronic migraine: Results from a 52-week,  
42  
43 381 open-label extension study. Cephalalgia. 2020;40(6):543-53.  
44  
45 382 26. Rapoport A, Mauskop A, Diener HC, Schwalen S, Pfeil J. Long-term migraine prevention  
46  
47 383 with topiramate: open-label extension of pivotal trials. Headache. 2006;46(7):1151-60.  
48  
49  
50  
51  
52 384  
53  
54  
55 385

1  
2  
3 386 **Figure 1.** Change in (A) MMD and (B) MSMD from baseline. The mean (SE) change from  
4  
5 387 baseline in MMD and MSMD during the DBTP and OLTP is shown for the treatment groups. For  
6  
7 388 the OLTP, data are shown for the total population. The dotted line indicates that patients in the  
8  
9 389 placebo group during the DBTP received erenumab 70 mg during the OLTP starting at week 24.  
10  
11 390 \*The number of patients in the efficacy analysis set during the DBTP. Error bars represent SE. n  
12  
13 = number of patients with observed data. DBTP, double-blind treatment period; MMD, monthly  
14 391 migraine days; MSMD, monthly acute migraine-specific medication treatment days; OLTP,  
15  
16 392 open-label treatment period; SE, standard error of the mean.  
17  
18 393

19  
20  
21 394 **Figure 2.** Patients achieving a (A)  $\geq 50\%$  and (B)  $\geq 75\%$  reduction in MMD from baseline. For the  
22  
23 395 OLTP, data are shown for the total population. The dotted line indicates that patients in the  
24  
25 396 placebo group during the DBTP received erenumab 70 mg during the OLTP starting at week 24.  
26  
27 397 \*The number of patients in the efficacy analysis set during the DBTP. n = number of patients  
28  
29 398 with observed data. DBTP, double-blind treatment period; MMD, monthly migraine days; OLTP,  
30  
31 399 open-label treatment period.  
32  
33

34 400  
35  
36  
37  
38  
39  
40  
41  
42  
43  
44  
45  
46  
47  
48  
49  
50  
51  
52  
53  
54  
55  
56  
57  
58  
59  
60

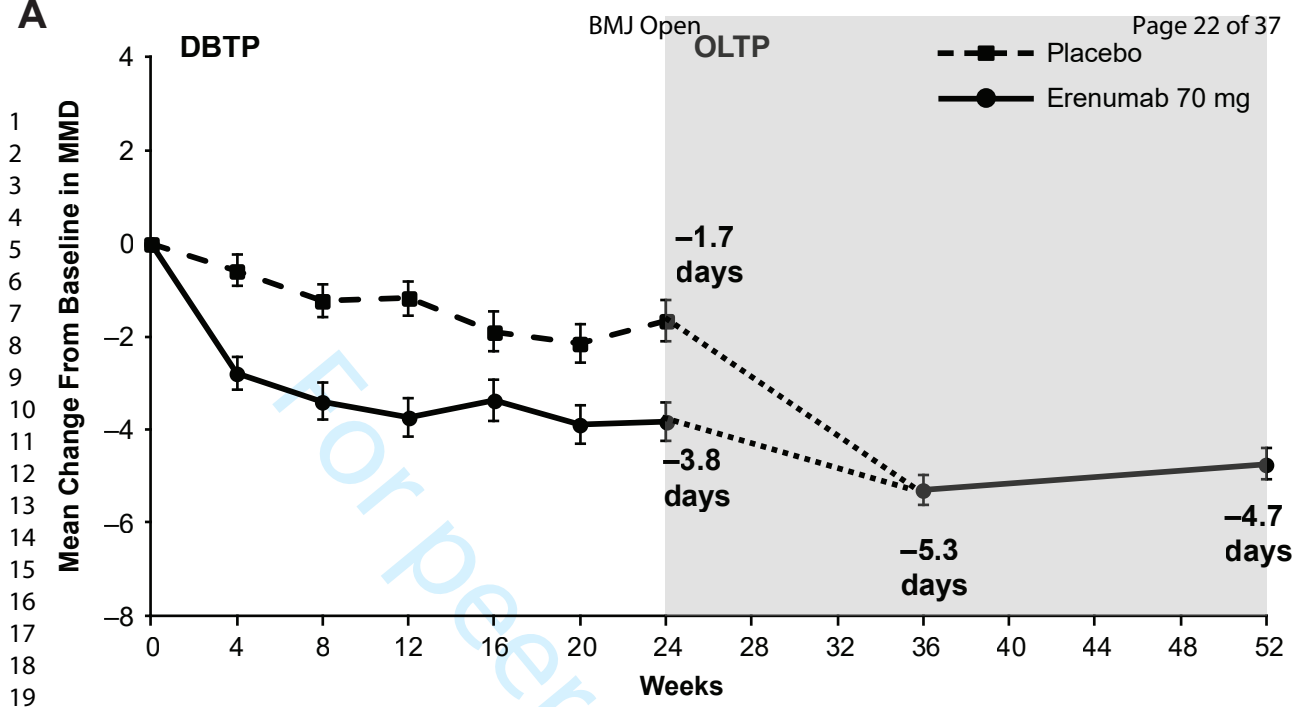

|                    |      |      |      |      |      |      |     |     |
|--------------------|------|------|------|------|------|------|-----|-----|
| Placebo (n)        | 130* | 130* | 128* | 128* | 126* | 127* |     |     |
| Erenumab 70 mg (n) | 130* | 129* | 128* | 128* | 128* | 129* | 246 | 243 |



For peer review only - <http://bmjopen.bmj.com/site/about/guidelines.xhtml>

|                    |      |      |      |      |      |      |     |     |
|--------------------|------|------|------|------|------|------|-----|-----|
| Placebo (n)        | 130* | 130* | 128* | 128* | 126* | 127* |     |     |
| Erenumab 70 mg (n) | 130* | 129* | 128* | 128* | 128* | 129* | 246 | 243 |

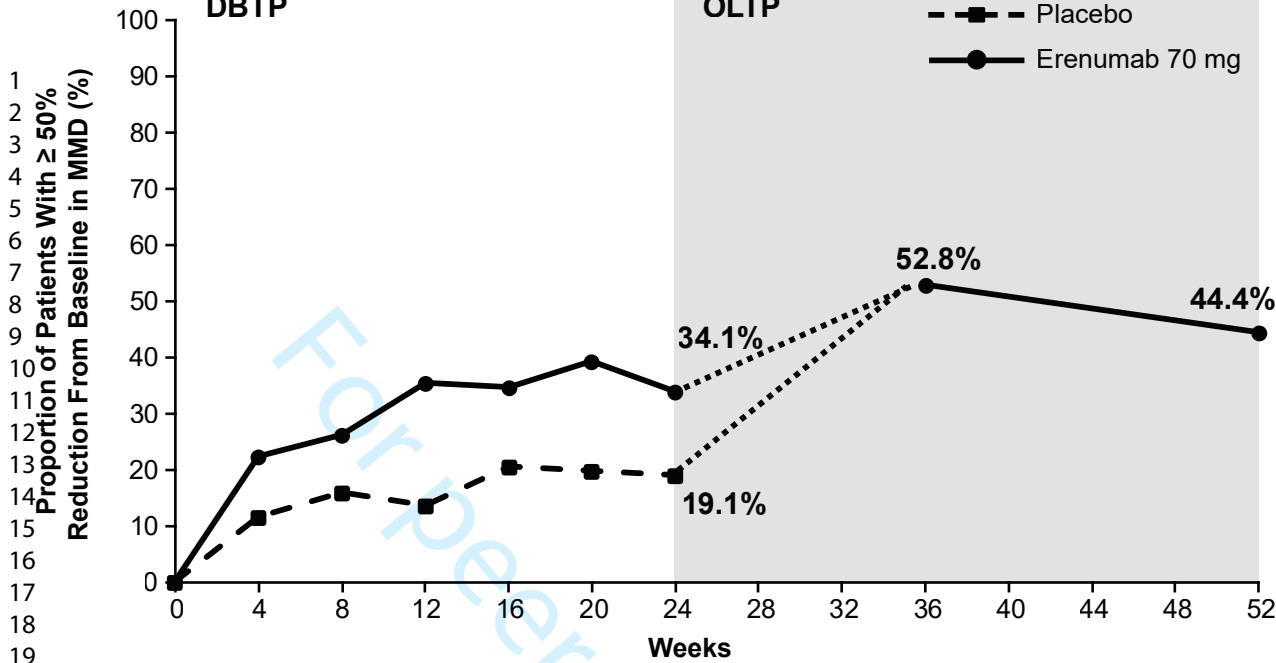

|                    |      |      |      |      |      |      |     |     |
|--------------------|------|------|------|------|------|------|-----|-----|
| Placebo (n)        | 131* | 131* | 131* | 131* | 131* | 131* |     |     |
| Erenumab 70 mg (n) | 130* | 130* | 130* | 130* | 130* | 130* | 246 | 243 |

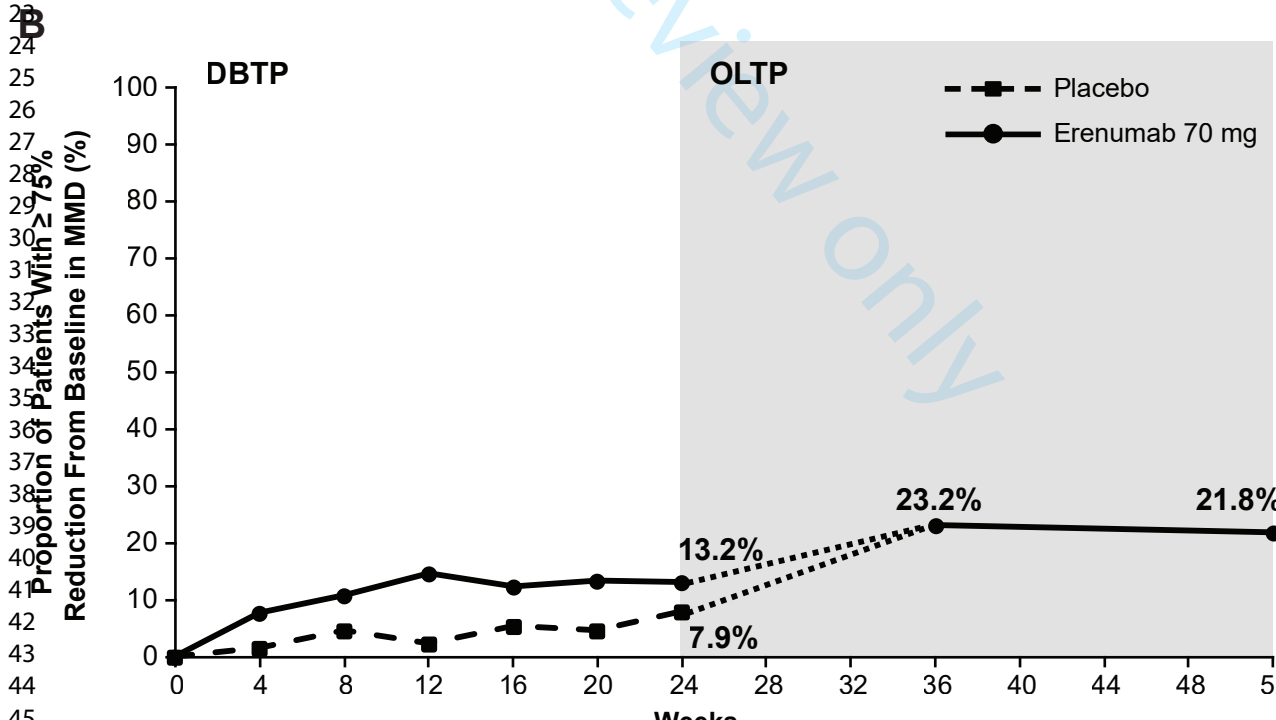

|                    |      |      |      |      |      |      |     |     |
|--------------------|------|------|------|------|------|------|-----|-----|
| Placebo (n)        | 130* | 130* | 128* | 128* | 126* | 127* |     |     |
| Erenumab 70 mg (n) | 130* | 129* | 128* | 128* | 128* | 129* | 246 | 243 |

# SUPPLEMENTARY APPENDIX

## Table of Contents

|                                        |   |
|----------------------------------------|---|
| Figure S1 – Study Design.....          | 2 |
| Figure S2 – Patient Disposition.....   | 3 |
| Table S1 – Ethics Committees/IRBs..... | 4 |

For peer review only

1 **Figure S1**



18 **Study design.** IP, investigational product; QM, once monthly; SC, subcutaneous.

Peer review only

Figure S2

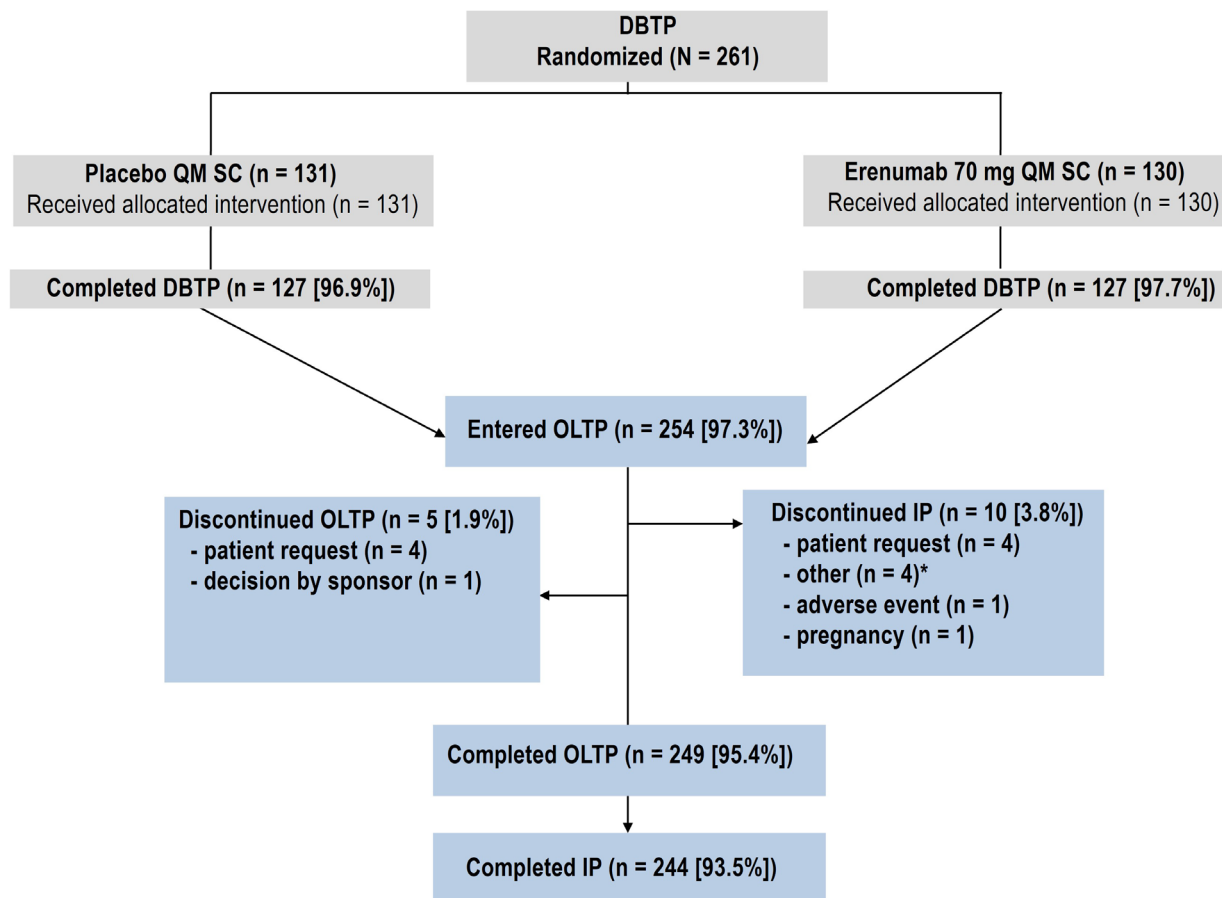

**Patient disposition.** \*Other refers to COVID-19 control measures. COVID-19, coronavirus disease 2019; DBTP, double-blind treatment period; IP, investigational product; OLTP, open-label treatment period; QM, once monthly; SC, subcutaneous.



**Table S1**

| Study Number | Site Number | Site Name                                        | IRB/IEC Name                                                                    | IRB/IEC Address                                                         |
|--------------|-------------|--------------------------------------------------|---------------------------------------------------------------------------------|-------------------------------------------------------------------------|
| 20170609     | 34001       | Saitama Neuropsychiatric Institute               | Saitama Medical University Hospital Institutional Review Board                  | 38 Moroyamamachi Morohongo, Iruma-gun, Saitama, 350-0495, Japan         |
| 20170609     | 34002       | Fukuuchi Pain Clinic                             | Tokyo-Eki Center-Building Clinic Institutional Review Board                     | 3-3-14 Nihombashi, Chuo-ku, Tokyo, 103-0027, Japan                      |
| 20170609     | 34003       | Kumamoto City Hospital                           | Kumamoto City Hospital Institutional Review Board                               | 4-1-60 Higashimachi Higashi-ku, Kumamoto-shi, Kumamoto, 862-8505, Japan |
| 20170609     | 34005       | Dokkyo Medical University Hospital               | Dokkyo Medical University Hospital Institutional Review Board                   | 880 Kitakobayashi Mibumachi, Shimotsuga-gun, Tochigi, 321-0293, Japan   |
| 20170609     | 34006       | Iwate Medical University Uchimaru Medical Center | Iwate Medical University Hospital Institutional Review Board                    | 19-1 Uchimaru, Morioka-shi, Iwate, 020-8505, Japan                      |
| 20170609     | 34007       | Niwa Family Clinic                               | Medical Corporation Shintokai Yokohama Minoru Clinic Institutional Review Board | 1-13-8 Bessho Minami-ku, Yokohama-shi, Kanagawa, 232-0064, Japan        |
| 20170609     | 34008       | Osoegawa Neurology Clinic                        | Medical Corporation Shintokai Yokohama Minoru Clinic Institutional Review Board | 1-13-8 Bessho Minami-ku, Yokohama-shi, Kanagawa, 232-0064, Japan        |
| 20170609     | 34009       | Tanaka Neurosurgical Clinic                      | Medical Corporation Shintokai Yokohama Minoru Clinic Institutional Review Board | 1-13-8 Bessho Minami-ku, Yokohama-shi, Kanagawa, 232-0064, Japan        |
| 20170609     | 34010       | Tokyo Headache Clinic                            | Medical Corporation Shintokai Yokohama Minoru Clinic Institutional Review Board | 1-13-8 Bessho Minami-ku, Yokohama-shi, Kanagawa, 232-0064, Japan        |

|          |       |                                                    |                                                                                 |                                                                     |
|----------|-------|----------------------------------------------------|---------------------------------------------------------------------------------|---------------------------------------------------------------------|
| 20170609 | 34011 | Fujitsu Clinic                                     | Medical Corporation Shintokai Yokohama Minoru Clinic Institutional Review Board | 1-13-8 Bessho Minami-ku, Yokohama-shi, Kanagawa, 232-0064, Japan    |
| 20170609 | 34012 | Sendai Headache and Neurology Clinic               | Gshozuka Clinic Institutional Review Board                                      | 1-21-4 Gshozuka Miyamae-ku, Kawasaki-shi, Kanagawa, 216-0021, Japan |
| 20170609 | 34013 | Nagamitsu Clinic                                   | Gshozuka Clinic Institutional Review Board                                      | 1-21-4 Gshozuka Miyamae-ku, Kawasaki-shi, Kanagawa, 216-0021, Japan |
| 20170609 | 34014 | Nagaseki Headache Clinic                           | Medical Corporation Shintokai Yokohama Minoru Clinic Institutional Review Board | 1-13-8 Bessho Minami-ku, Yokohama-shi, Kanagawa, 232-0064, Japan    |
| 20170609 | 34015 | Negoro Neurology Clinic                            | Gshozuka Clinic Institutional Review Board                                      | 1-21-4 Gshozuka Miyamae-ku, Kawasaki-shi, Kanagawa, 216-0021, Japan |
| 20170609 | 34016 | Saino Clinic                                       | Gshozuka Clinic Institutional Review Board                                      | 1-21-4 Gshozuka Miyamae-ku, Kawasaki-shi, Kanagawa, 216-0021, Japan |
| 20170609 | 34017 | St Marianna University School of Medicine Hospital | St Marianna University Group Institutional Review Board                         | 2-16-1 Sugao Miyamae-ku, Kawasaki-shi, Kanagawa, 216-8511, Japan    |
| 20170609 | 34018 | Sakura Clinic                                      | Gshozuka Clinic Institutional Review Board                                      | 1-21-4 Gshozuka Miyamae-ku, Kawasaki-shi, Kanagawa, 216-0021, Japan |
| 20170609 | 34019 | Tatsuoka Neurology Clinic                          | Tatsuoka Neurology Clinic Institutional Review Board                            | 35-3 Chudojibojyocho Shimogyo-ku, Kyoto-shi, Kyoto, 600-8811, Japan |
| 20170609 | 34020 | Kitasato University Kitasato Institute Hospital    | The IRB of Kitasato University Shirokane Campus                                 | 5-9-1 Shirokane, Minato-ku, Tokyo, 108-8642, Japan                  |

1  
2  
3  
4  
5  
6  
7  
8  
9  
10  
11  
12  
13  
14  
15  
16  
17  
18  
19  
20  
21  
22  
23  
24  
25  
26  
27  
28  
29  
30  
31  
32  
33  
34  
35  
36  
37  
38  
39  
40  
41  
42  
43  
44  
45  
46  
47  
48  
49  
50  
51  
52  
53  
54  
55  
56  
57  
58  
59  
60

|          |       |                                    |                                                       |                                                  |
|----------|-------|------------------------------------|-------------------------------------------------------|--------------------------------------------------|
| 20170609 | 34021 | Tokai University Hachioji Hospital | Tokai University Hospitals Institutional Review Board | 1-2-5 Yoyogi, Shibuya-ku, Tokyo, 151-0053, Japan |
|----------|-------|------------------------------------|-------------------------------------------------------|--------------------------------------------------|

For peer review only

|          |       |                                      |                                                       |                                                                      |
|----------|-------|--------------------------------------|-------------------------------------------------------|----------------------------------------------------------------------|
| 20170609 | 34021 | Tokai University Hachioji Hospital   | Tokai University Hospitals Institutional Review Board | 143 Shimokasuya, Isehara-shi, Kanagawa, 259-1193, Japan              |
| 20170609 | 34021 | Tokai University Hachioji Hospital   | Tokai University Hospitals Institutional Review Board | 21-1 Gakkyo Oiso-machi, Naka-gun, Kanagawa, 259-0198, Japan          |
| 20170609 | 34021 | Tokai University Hachioji Hospital   | Tokai University Hospitals Institutional Review Board | 1838 Ishikawamachi, Hachioji-shi, Tokyo, 192-0032, Japan             |
| 20170609 | 34022 | Takase Internal Medicine Clinic      | Gshozuka Clinic Institutional Review Board            | 1-21-4 Gshozuka Miyamae-ku, Kawasaki-shi, Kanagawa, 216-0021, Japan  |
| 20170609 | 34023 | Tominaga Hospital                    | Tominaga Hospital Institutional Review Board          | 1-4-48 Minatomachi Naniwa-ku, Osaka-shi, Osaka, 556-0017, Japan      |
| 20170609 | 34024 | Konan Medical Center                 | Konan Medical Center IRB                              | 1-5-16 Kamokogahara Higashinada-ku, Kobe-shi, Hyogo, 658-0064, Japan |
| 20170609 | 34025 | Japanese Red Cross Shizuoka Hospital | Japanese Red Cross Shizuoka Hospital IRB              | 8-2 Otemachi Aoi-ku, Shizuoka-shi, Shizuoka, 420-0853, Japan         |

|          |       |                                          |                                                                                  |                                                                           |
|----------|-------|------------------------------------------|----------------------------------------------------------------------------------|---------------------------------------------------------------------------|
| 20170609 | 34026 | Nakamura Memorial Hospital               | Nakamura Memorial Hospital Nakamura Memorial Hospital Institutional Review Board | 14-291 Minami 1-jo Nishi, Chuo-ku, Sapporo-shi, Hokkaido, 060-8570, Japan |
| 20170609 | 34027 | Saitama Medical University Hospital      | Saitama Medical University Hospital Institutional Review Board                   | 38 Moroyamamachi Morohongo, Iruma-gun, Saitama, 350-0495, Japan           |
| 20170609 | 34028 | Sakuragi Headache Clinic                 | Saga Memorial Hospital Institutional Review Board                                | 1240-1 Nagase Takakise-machi, Saga-shi, Saga, 849-0917, Japan             |
| 20170609 | 34029 | Sapporo Isobe Headache and Memory Clinic | Sapporo Medical Associations Institutional Review Board                          | 19-1-1 Odorinishi Chuo-ku, Sapporo-shi, Hokkaido, 060-8581, Japan         |
| 20170609 | 34030 | Kokubu Clinic                            | Medical Corporation Shintokai Yokohama Minoru Clinic Institutional Review Board  | 1-13-8 Bessho Minami-ku, Yokohama-shi, Kanagawa, 232-0064, Japan          |
| 20170609 | 34031 | Umenotsuji Clinic                        | Medical Corporation Shintokai Yokohama Minoru Clinic Institutional Review Board  | 1-13-8 Bessho Minami-ku, Yokohama-shi, Kanagawa, 232-0064, Japan          |
| 20170609 | 34032 | Sanno Clinic Shinagawa                   | Shinagawa East One Medical Clinic Institutional Review Board                     | 2-16-1 Kounan, Shinagawa East One 3F, Minato-ku, Tokyo, 108-0075, Japan   |

|          |       |                                                      |                                                                                 |                                                                                 |
|----------|-------|------------------------------------------------------|---------------------------------------------------------------------------------|---------------------------------------------------------------------------------|
| 20170609 | 34033 | Ooba Clinic for Neurosurgery and Headache            | Nihonbashi Sakura Clinic Institutional Review Board                             | 1-9-2 Nihonbashikayabacho, Inamura Building 5F, Chuo-ku, Tokyo, 103-0025, Japan |
| 20170609 | 34034 | Doi Internal Medicine Neurology                      | Gshozuka Clinic Institutional Review Board                                      | 1-21-4 Gshozuka Miyamae-ku, Kawasaki-shi, Kanagawa, 216-0021, Japan             |
| 20170609 | 34035 | Ikeda Neurosurgical Clinic                           | Medical Corporation Shintokai Yokohama Minoru Clinic Institutional Review Board | 1-13-8 Bessho Minami-ku, Yokohama-shi, Kanagawa, 232-0064, Japan                |
| 20170609 | 34036 | Jinnouchi Neurosurgery Clinic                        | Medical Corporation Shintokai Yokohama Minoru Clinic Institutional Review Board | 1-13-8 Bessho Minami-ku, Yokohama-shi, Kanagawa, 232-0064, Japan                |
| 20170609 | 34037 | Kijima Neurosurgery Clinic                           | Gshozuka Clinic Institutional Review Board                                      | 1-21-4 Gshozuka Miyamae-ku, Kawasaki-shi, Kanagawa, 216-0021, Japan             |
| 20170609 | 34038 | Medical Corporation Yufukai Shimoda Neurology Clinic | Gshozuka Clinic Institutional Review Board                                      | 1-21-4 Gshozuka Miyamae-ku, Kawasaki-shi, Kanagawa, 216-0021, Japan             |

|          |       |                                                   |                                                                                 |                                                                                 |
|----------|-------|---------------------------------------------------|---------------------------------------------------------------------------------|---------------------------------------------------------------------------------|
| 20170609 | 34039 | Medical Corporation Seikokai Takanoko Hospital    | Medical Corporation Seikokai Takanoko Hospital Institutional Review Board       | 525-1 Takanokomachi, Matsuyama-shi, Ehime, 790-0925, Japan                      |
| 20170609 | 34040 | Medical Corporation Inoue Neurology Clinic        | Medical Corporation Shintokai Yokohama Minoru Clinic Institutional Review Board | 1-13-8 Bessho Minami-ku, Yokohama-shi, Kanagawa, 232-0064, Japan                |
| 20170609 | 34041 | Sakuma Neurological Clinic                        | Gshozuka Clinic Institutional Review Board                                      | 1-21-4 Gshozuka Miyamae-ku, Kawasaki-shi, Kanagawa, 216-0021, Japan             |
| 20170609 | 34042 | Higashi Sapporo Neurology and Neurosurgery Clinic | Nihonbashi Sakura Clinic Institutional Review Board                             | 1-9-2 Nihonbashikayabacho, Inamura Building 5F, Chuo-ku, Tokyo, 103-0025, Japan |



## CONSORT 2010 checklist of information to include when reporting a randomised trial\*

| Section/Topic             | Item No | Checklist item                                                                                                                        | Reported on page No                                                                                                      |
|---------------------------|---------|---------------------------------------------------------------------------------------------------------------------------------------|--------------------------------------------------------------------------------------------------------------------------|
| <b>Title and abstract</b> |         |                                                                                                                                       |                                                                                                                          |
|                           | 1a      | Identification as a randomised trial in the title                                                                                     | 1                                                                                                                        |
|                           | 1b      | Structured summary of trial design, methods, results, and conclusions (for specific guidance see CONSORT for abstracts)               | 2,3                                                                                                                      |
| <b>Introduction</b>       |         |                                                                                                                                       |                                                                                                                          |
| Background and objectives | 2a      | Scientific background and explanation of rationale                                                                                    | 4                                                                                                                        |
|                           | 2b      | Specific objectives or hypotheses                                                                                                     | 4                                                                                                                        |
| <b>Methods</b>            |         |                                                                                                                                       |                                                                                                                          |
| Trial design              | 3a      | Description of trial design (such as parallel, factorial) including allocation ratio                                                  | 5                                                                                                                        |
|                           | 3b      | Important changes to methods after trial commencement (such as eligibility criteria), with reasons                                    | NA                                                                                                                       |
| Participants              | 4a      | Eligibility criteria for participants                                                                                                 | 5,6                                                                                                                      |
|                           | 4b      | Settings and locations where the data were collected                                                                                  | 5                                                                                                                        |
| Interventions             | 5       | The interventions for each group with sufficient details to allow replication, including how and when they were actually administered | 5                                                                                                                        |
| Outcomes                  | 6a      | Completely defined pre-specified primary and secondary outcome measures, including how and when they were assessed                    | 6,7                                                                                                                      |
|                           | 6b      | Any changes to trial outcomes after the trial commenced, with reasons                                                                 | NA                                                                                                                       |
| Sample size               | 7a      | How sample size was determined                                                                                                        | NA; sample size was based on the number of patients who completed the DBTP and received at least one dose of erenumab 70 |



|    |                     |     |                                                                                                              |
|----|---------------------|-----|--------------------------------------------------------------------------------------------------------------|
| 1  |                     |     | mg in the                                                                                                    |
| 2  |                     |     | OLTP                                                                                                         |
| 3  |                     | 7b  | When applicable, explanation of any interim analyses and stopping guidelines                                 |
| 4  | Randomisation:      |     | NA                                                                                                           |
| 5  | Sequence            | 8a  | Method used to generate the random allocation sequence                                                       |
| 6  | generation          | 8b  | Type of randomisation; details of any restriction (such as blocking and block size)                          |
| 7  | Allocation          | 9   | Mechanism used to implement the random allocation sequence (such as sequentially numbered containers),       |
| 8  | concealment         |     | describing any steps taken to conceal the sequence until interventions were assigned                         |
| 9  | mechanism           |     | NA                                                                                                           |
| 10 | Implementation      | 10  | Who generated the random allocation sequence, who enrolled participants, and who assigned participants to    |
| 11 |                     |     | interventions                                                                                                |
| 12 |                     |     | 5                                                                                                            |
| 13 | Blinding            | 11a | If done, who was blinded after assignment to interventions (for example, participants, care providers, those |
| 14 |                     |     | assessing outcomes) and how                                                                                  |
| 15 |                     | 11b | If relevant, description of the similarity of interventions                                                  |
| 16 |                     |     | NA                                                                                                           |
| 17 |                     |     | NA; this is a                                                                                                |
| 18 |                     |     | single-arm                                                                                                   |
| 19 |                     |     | open-label                                                                                                   |
| 20 |                     |     | extension                                                                                                    |
| 21 |                     |     | 7                                                                                                            |
| 22 | Statistical methods | 12a | Statistical methods used to compare groups for primary and secondary outcomes                                |
| 23 |                     | 12b | Methods for additional analyses, such as subgroup analyses and adjusted analyses                             |
| 24 |                     |     | NA                                                                                                           |
| 25 | <b>Results</b>      |     |                                                                                                              |
| 26 | Participant flow (a | 13a | For each group, the numbers of participants who were randomly assigned, received intended treatment, and     |
| 27 | diagram is strongly |     | were analysed for the primary outcome                                                                        |
| 28 | recommended)        | 13b | For each group, losses and exclusions after randomisation, together with reasons                             |
| 29 | Recruitment         | 14a | Dates defining the periods of recruitment and follow-up                                                      |
| 30 |                     | 14b | Why the trial ended or was stopped                                                                           |
| 31 |                     |     | 5                                                                                                            |
| 32 | Baseline data       | 15  | A table showing baseline demographic and clinical characteristics for each group                             |
| 33 | Numbers analysed    | 16  | For each group, number of participants (denominator) included in each analysis and whether the analysis was  |
| 34 |                     |     | by original assigned groups                                                                                  |
| 35 |                     |     | 8                                                                                                            |
| 36 | Outcomes and        | 17a | For each primary and secondary outcome, results for each group, and the estimated effect size and its        |
| 37 | estimation          |     | precision (such as 95% confidence interval)                                                                  |
| 38 |                     |     | 8-10, Figure                                                                                                 |
| 39 |                     |     | 1, Figure 2                                                                                                  |
| 40 |                     | 17b | For binary outcomes, presentation of both absolute and relative effect sizes is recommended                  |
| 41 | Ancillary analyses  | 18  | Results of any other analyses performed, including subgroup analyses and adjusted analyses, distinguishing   |
| 42 |                     |     | NA                                                                                                           |

|    |                          |                                                                                                                     |                                                      |
|----|--------------------------|---------------------------------------------------------------------------------------------------------------------|------------------------------------------------------|
| 1  |                          | pre-specified from exploratory                                                                                      | NA                                                   |
| 2  | Harms                    | 19 All important harms or unintended effects in each group (for specific guidance see CONSORT for harms)            | 10-12                                                |
| 3  | <b>Discussion</b>        |                                                                                                                     |                                                      |
| 4  | Limitations              | 20 Trial limitations, addressing sources of potential bias, imprecision, and, if relevant, multiplicity of analyses | 3, 14                                                |
| 5  | Generalisability         | 21 Generalisability (external validity, applicability) of the trial findings                                        | 13-14                                                |
| 6  | Interpretation           | 22 Interpretation consistent with results, balancing benefits and harms, and considering other relevant evidence    | 14                                                   |
| 7  | <b>Other information</b> |                                                                                                                     |                                                      |
| 8  | Registration             | 23 Registration number and name of trial registry                                                                   | 3                                                    |
| 9  | Protocol                 | 24 Where the full trial protocol can be accessed, if available                                                      | Protocol will<br>be provided<br>during<br>submission |
| 10 | Funding                  | 25 Sources of funding and other support (such as supply of drugs), role of funders                                  | 3                                                    |

18

19 \*We strongly recommend reading this statement in conjunction with the CONSORT 2010 Explanation and Elaboration for important clarifications on all the items. If relevant, we also

20 recommend reading CONSORT extensions for cluster randomised trials, non-inferiority and equivalence trials, non-pharmacological treatments, herbal interventions, and pragmatic trials.

21 Additional extensions are forthcoming: for those and for up to date references relevant to this checklist, see [www.consort-statement.org](http://www.consort-statement.org).

22

23

24

25

26

27

28

29

30

31

32

33

34

35

36

37

38

39

40

41

42

1  
2  
3 **Items to include when reporting a randomized trial in a journal or conference abstract**  
4  
5

| Item               | Description                                                                                                 | Reported on line number |
|--------------------|-------------------------------------------------------------------------------------------------------------|-------------------------|
| Title              | Identification of the study as randomized                                                                   | 2                       |
| Authors *          | Contact details for the corresponding author                                                                | 15,16                   |
| Trial design       | Description of the trial design (e.g. parallel, cluster, non-inferiority)                                   | 27                      |
| <b>Methods</b>     |                                                                                                             |                         |
| Participants       | Eligibility criteria for participants and the settings where the data were collected                        | 28-31                   |
| Interventions      | Interventions intended for each group                                                                       | 32                      |
| Objective          | Specific objective or hypothesis                                                                            | 24-26                   |
| Outcome            | Clearly defined primary outcome for this report                                                             | 33-36                   |
| Randomization      | How participants were allocated to interventions                                                            | NA                      |
| Blinding (masking) | Whether or not participants, care givers, and those assessing the outcomes were blinded to group assignment | NA                      |
| <b>Results</b>     |                                                                                                             |                         |
| Numbers randomized | Number of participants randomized to each group                                                             | 30                      |
| Recruitment        | Trial status                                                                                                | NA                      |
| Numbers analysed   | Number of participants analysed in each group                                                               | 30-31                   |
| Outcome            | For the primary outcome, a result for each group and the estimated effect size and its precision            | 37-42                   |
| Harms              | Important adverse events or side effects                                                                    | 42-45                   |
| Conclusions        | General interpretation of the results                                                                       | 46-48                   |
| Trial registration | Registration number and name of trial register                                                              | 49                      |
| Funding            | Source of funding                                                                                           | 50                      |

38  
39 *\*this item is specific to conference abstracts*  
40  
41  
42  
43  
44  
45  
46  
47  
48  
49  
50  
51  
52  
53  
54  
55  
56  
57  
58  
59  
60

# The CONSORT-PRO Reporting Guidance Checklist

| Section/Topic             | CONSORT-PRO Item | Recommended Content                                                                                                                                                                                 | Page Addressed |
|---------------------------|------------------|-----------------------------------------------------------------------------------------------------------------------------------------------------------------------------------------------------|----------------|
| <b>Title and Abstract</b> |                  |                                                                                                                                                                                                     |                |
|                           | P1b              | The PRO should be identified in the abstract as a primary or secondary outcome.                                                                                                                     | 2              |
| <b>Introduction</b>       |                  |                                                                                                                                                                                                     |                |
| Background and objectives | 2a               | The scientific background and explanation of rationale of PRO assessment should be included.                                                                                                        | NA             |
|                           | P2b              | The PRO hypothesis should be stated, and relevant domains identified, if applicable.                                                                                                                | NA             |
| <b>Methods</b>            |                  |                                                                                                                                                                                                     |                |
| Participants              | 4a               | PRO-specific criteria are required only if PROs were used for eligibility or stratification.                                                                                                        | 6              |
| Outcomes                  | P6a              | Evidence of PRO instrument validity and reliability should be provided or cited if available including the person completing the PRO and methods of data collection (paper, telephone, electronic). | NA             |
| Sample size               | 7a               | Sample size determination is required only if PRO is a primary study outcome.                                                                                                                       | NA             |
| <b>Randomization</b>      |                  |                                                                                                                                                                                                     |                |
| Statistical methods       | P12a             | Statistical approaches for dealing with missing data are explicitly stated.                                                                                                                         | NA             |
| <b>Results</b>            |                  |                                                                                                                                                                                                     |                |
| Participant flow          | 13a              | The number of PRO outcome data at baseline and at subsequent time points should be transparent.                                                                                                     | Figure S2      |
| Baseline data             | 15               | PRO data in the table showing baseline demographic and clinical characteristics for each group should be included.                                                                                  | 8 (Table 1)    |
| Numbers analyzed          | 16               | For each group, the number of participants (denominator) included in each analysis and whether the analysis was by original assigned groups) is required for PRO results.                           | 9-10 (Table 2) |
| Outcomes and estimation   | 17a              | The estimated effect size and its precision such as 95% confidence interval should be presented for multidimensional PROs from each domain and time point.                                          | NA             |
| Ancillary analyses        | 18               | Results of any other PRO analyses performed, including subgroup analyses and adjusted analyses, distinguishing pre-specified from exploratory should be presented, where relevant.                  | NA             |
| <b>Discussion</b>         |                  |                                                                                                                                                                                                     |                |
| Limitation                | P20/21           | PRO-specific limitations and implications for generalizability and clinical practice should be presented.                                                                                           | NA             |
| Interpretation            | 22               | PRO data should be interpreted in relation to clinical outcomes including survival data, where relevant.                                                                                            | NA             |

Calvert M, Blazeby J, Altman DG, et al. Reporting of patient-reported outcomes in randomized trials: the CONSORT PRO extension. *JAMA*. 2013;309(8):814-822. doi:10.1001/jama.2013.879

**Note:** The CONSORT-PRO Extension should be used with the CONSORT 2010 Statement and any other relevant CONSORT Extensions, found at [consort-statement.org](http://consort-statement.org)

For peer review only - <http://bmjopen.bmj.com/site/about/guidelines.xhtml>
