# Supplementary material for: Long-term efficacy and safety of erenumab in Japanese patients with episodic and chronic migraine: results from a 28-week open-label treatment period of a randomised trial
Source: PubMed Central journal article supplement — BMJ Open. 2023 Aug 18;13(8):e068616. doi: 10.1136/bmjopen-2022-068616 (PMC10441051; doi:10.1136/bmjopen-2022-068616), 2023-08-18
Supplement: bmjopen-2022-068616supp001.pdf [file bmjopen-2022-068616supp001.pdf]

## SUPPLEMENTARY APPENDIX

### Table of Contents

|                                        |   |
|----------------------------------------|---|
| Figure S1 – Study Design.....          | 2 |
| Figure S2 – Patient Disposition.....   | 3 |
| Table S1 – Ethics Committees/IRBs..... | 4 |

Figure S1

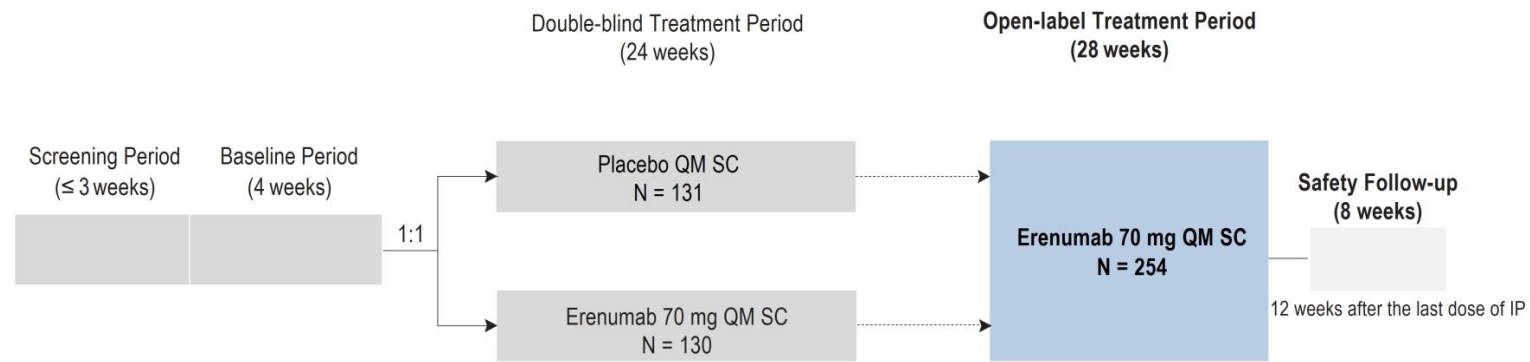

**Study design.** IP, investigational product; QM, once monthly; SC, subcutaneous.

Figure S2

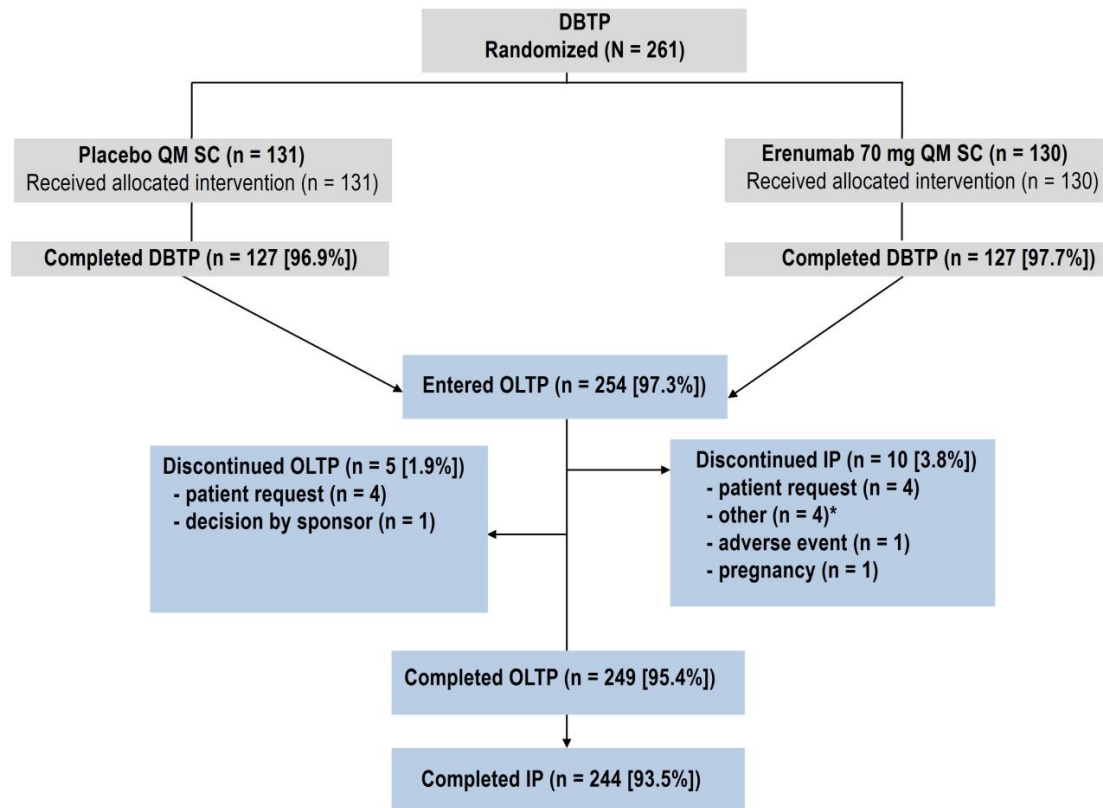

**Patient disposition.** \*Other refers to COVID-19 control measures. COVID-19, coronavirus disease 2019; DBTP, double-blind treatment period; IP, investigational product; OLTP, open-label treatment period; QM, once monthly; SC, subcutaneous.

**Table S1**

| Study Number | Site Number | Site Name                                        | IRB/IEC Name                                                                    | IRB/IEC Address                                                         |
|--------------|-------------|--------------------------------------------------|---------------------------------------------------------------------------------|-------------------------------------------------------------------------|
| 20170609     | 34001       | Saitama Neuropsychiatric Institute               | Saitama Medical University Hospital Institutional Review Board                  | 38 Moroyamamachi Morohongo, Iruma-gun, Saitama, 350-0495, Japan         |
| 20170609     | 34002       | Fukuuchi Pain Clinic                             | Tokyo-Eki Center-Building Clinic Institutional Review Board                     | 3-3-14 Nihombashi, Chuo-ku, Tokyo, 103-0027, Japan                      |
| 20170609     | 34003       | Kumamoto City Hospital                           | Kumamoto City Hospital Institutional Review Board                               | 4-1-60 Higashimachi Higashi-ku, Kumamoto-shi, Kumamoto, 862-8505, Japan |
| 20170609     | 34005       | Dokkyo Medical University Hospital               | Dokkyo Medical University Hospital Institutional Review Board                   | 880 Kitakobayashi Mibumachi, Shimotsuga-gun, Tochigi, 321-0293, Japan   |
| 20170609     | 34006       | Iwate Medical University Uchimaru Medical Center | Iwate Medical University Hospital Institutional Review Board                    | 19-1 Uchimaru, Morioka-shi, Iwate, 020-8505, Japan                      |
| 20170609     | 34007       | Niwa Family Clinic                               | Medical Corporation Shintokai Yokohama Minoru Clinic Institutional Review Board | 1-13-8 Bessho Minami-ku, Yokohama-shi, Kanagawa, 232-0064, Japan        |
| 20170609     | 34008       | Osoegawa Neurology Clinic                        | Medical Corporation Shintokai Yokohama Minoru Clinic Institutional Review Board | 1-13-8 Bessho Minami-ku, Yokohama-shi, Kanagawa, 232-0064, Japan        |
| 20170609     | 34009       | Tanaka Neurosurgical Clinic                      | Medical Corporation Shintokai Yokohama Minoru Clinic Institutional Review Board | 1-13-8 Bessho Minami-ku, Yokohama-shi, Kanagawa, 232-0064, Japan        |
| 20170609     | 34010       | Tokyo Headache Clinic                            | Medical Corporation Shintokai Yokohama Minoru Clinic Institutional Review Board | 1-13-8 Bessho Minami-ku, Yokohama-shi, Kanagawa, 232-0064, Japan        |

|          |       |                                                    |                                                                                 |                                                                      |
|----------|-------|----------------------------------------------------|---------------------------------------------------------------------------------|----------------------------------------------------------------------|
| 20170609 | 34011 | Fujitsu Clinic                                     | Medical Corporation Shintokai Yokohama Minoru Clinic Institutional Review Board | 1-13-8 Bessho Minami-ku, Yokohama-shi, Kanagawa, 232-0064, Japan     |
| 20170609 | 34012 | Sendai Headache and Neurology Clinic               | Gshozuka Clinic Institutional Review Board                                      | 1-21-4 Gshozuka Miyamae-ku, Kawasaki- shi, Kanagawa, 216-0021, Japan |
| 20170609 | 34013 | Nagamitsu Clinic                                   | Gshozuka Clinic Institutional Review Board                                      | 1-21-4 Gshozuka Miyamae-ku, Kawasaki- shi, Kanagawa, 216-0021, Japan |
| 20170609 | 34014 | Nagaseki Headache Clinic                           | Medical Corporation Shintokai Yokohama Minoru Clinic Institutional Review Board | 1-13-8 Bessho Minami-ku, Yokohama-shi, Kanagawa, 232-0064, Japan     |
| 20170609 | 34015 | Negoro Neurology Clinic                            | Gshozuka Clinic Institutional Review Board                                      | 1-21-4 Gshozuka Miyamae-ku, Kawasaki- shi, Kanagawa, 216-0021, Japan |
| 20170609 | 34016 | Saino Clinic                                       | Gshozuka Clinic Institutional Review Board                                      | 1-21-4 Gshozuka Miyamae-ku, Kawasaki- shi, Kanagawa, 216-0021, Japan |
| 20170609 | 34017 | St Marianna University School of Medicine Hospital | St Marianna University Group Institutional Review Board                         | 2-16-1 Sugao Miyamae- ku, Kawasaki-shi, Kanagawa, 216-8511, Japan    |
| 20170609 | 34018 | Sakura Clinic                                      | Gshozuka Clinic Institutional Review Board                                      | 1-21-4 Gshozuka Miyamae-ku, Kawasaki- shi, Kanagawa, 216-0021, Japan |
| 20170609 | 34019 | Tatsuoka Neurology Clinic                          | Tatsuoka Neurology Clinic Institutional Review Board                            | 35-3 Chudojibojyocho Shimogyo-ku, Kyoto-shi, Kyoto, 600-8811, Japan  |

|          |       |                                                       |                                                                                           |                                                                                    |
|----------|-------|-------------------------------------------------------|-------------------------------------------------------------------------------------------|------------------------------------------------------------------------------------|
| 20170609 | 34020 | Kitasato University<br>Kitasato Institute<br>Hospital | The IRB of Kitasato<br>University Shirokane<br>Campus                                     | 5-9-1 Shirokane, Minato-<br>ku, Tokyo, 108-8642, Japan                             |
| 20170609 | 34021 | Tokai University<br>Hachioji Hospital                 | Tokai University Hospitals<br>Institutional Review Board                                  | 1-2-5 Yoyogi, Shibuya-ku,<br>Tokyo, 151-0053, Japan                                |
| 20170609 | 34021 | Tokai University<br>Hachioji Hospital                 | Tokai University Hospitals<br>Institutional Review Board                                  | 143 Shimokasuya, Isehara-<br>shi, Kanagawa, 259-1193,<br>Japan                     |
| 20170609 | 34021 | Tokai University<br>Hachioji Hospital                 | Tokai University Hospitals<br>Institutional Review Board                                  | 21-1 Gakkyo Oiso-machi,<br>Naka-gun, Kanagawa, 259-<br>0198, Japan                 |
| 20170609 | 34021 | Tokai University<br>Hachioji Hospital                 | Tokai University Hospitals<br>Institutional Review Board                                  | 1838 Ishikawamachi,<br>Hachioji-shi, Tokyo, 192-<br>0032, Japan                    |
| 20170609 | 34022 | Takase Internal<br>Medicine Clinic                    | Goshozuka Clinic<br>Institutional Review Board                                            | 1-21-4 Goshozuka<br>Miyamae-ku, Kawasaki- shi,<br>Kanagawa, 216-0021,<br>Japan     |
| 20170609 | 34023 | Tominaga Hospital                                     | Tominaga Hospital<br>Institutional Review Board                                           | 1-4-48 Minatomachi<br>Naniwa-ku, Osaka-shi,<br>Osaka, 556-0017, Japan              |
| 20170609 | 34024 | Konan Medical Center                                  | Konan Medical Center IRB                                                                  | 1-5-16 Kamokogahara<br>Higashinada-ku, Kobe-shi,<br>Hyogo, 658-0064, Japan         |
| 20170609 | 34025 | Japanese Red Cross<br>Shizuoka Hospital               | Japanese Red Cross<br>Shizuoka Hospital IRB                                               | 8-2 Otemachi Aoi-ku,<br>Shizuoka-shi, Shizuoka,<br>420-0853, Japan                 |
| 20170609 | 34026 | Nakamura<br>Memorial<br>Hospital                      | Nakamura Memorial<br>Hospital Nakamura<br>Memorial Hospital<br>Institutional Review Board | 14-291 Minami 1-jo Nishi,<br>Chuo-ku, Sapporo-shi,<br>Hokkaido, 060-8570,<br>Japan |
| 20170609 | 34027 | Saitama Medical<br>University Hospital                | Saitama Medical University<br>Hospital Institutional Review<br>Board                      | 38 Moroyamamachi<br>Morohongo, Iruma-gun,<br>Saitama, 350-0495, Japan              |

|          |       |                                           |                                                                                 |                                                                                 |
|----------|-------|-------------------------------------------|---------------------------------------------------------------------------------|---------------------------------------------------------------------------------|
| 20170609 | 34028 | Sakuragi Headache Clinic                  | Saga Memorial Hospital Institutional Review Board                               | 1240-1 Nagase Takakise-machi, Saga-shi, Saga, 849-0917, Japan                   |
| 20170609 | 34029 | Sapporo Isobe Headache and Memory Clinic  | Sapporo Medical Associations Institutional Review Board                         | 19-1-1 Odorinishi Chuo-ku, Sapporo-shi, Hokkaido, 060-8581, Japan               |
| 20170609 | 34030 | Kokubu Clinic                             | Medical Corporation Shintokai Yokohama Minoru Clinic Institutional Review Board | 1-13-8 Bessho Minami-ku, Yokohama-shi, Kanagawa, 232-0064, Japan                |
| 20170609 | 34031 | Umenotsuji Clinic                         | Medical Corporation Shintokai Yokohama Minoru Clinic Institutional Review Board | 1-13-8 Bessho Minami-ku, Yokohama-shi, Kanagawa, 232-0064, Japan                |
| 20170609 | 34032 | Sanno Clinic Shinagawa                    | Shinagawa East One Medical Clinic Institutional Review Board                    | 2-16-1 Kounan, Shinagawa East One 3F, Minato-ku, Tokyo, 108-0075, Japan         |
| 20170609 | 34033 | Ooba Clinic for Neurosurgery and Headache | Nihonbashi Sakura Clinic Institutional Review Board                             | 1-9-2 Nihonbashikayabacho, Inamura Building 5F, Chuo-ku, Tokyo, 103-0025, Japan |
| 20170609 | 34034 | Doi Internal Medicine Neurology           | Gshozuka Clinic Institutional Review Board                                      | 1-21-4 Gshozuka Miyamae-ku, Kawasaki-shi, Kanagawa, 216-0021, Japan             |
| 20170609 | 34035 | Ikeda Neurosurgical Clinic                | Medical Corporation Shintokai Yokohama Minoru Clinic Institutional Review Board | 1-13-8 Bessho Minami-ku, Yokohama-shi, Kanagawa, 232-0064, Japan                |
| 20170609 | 34036 | Jinnouchi Neurosurgery Clinic             | Medical Corporation Shintokai Yokohama Minoru Clinic Institutional Review Board | 1-13-8 Bessho Minami-ku, Yokohama-shi, Kanagawa, 232-0064, Japan                |

|          |       |                                                      |                                                                                 |                                                                                 |
|----------|-------|------------------------------------------------------|---------------------------------------------------------------------------------|---------------------------------------------------------------------------------|
| 20170609 | 34037 | Kijima Neurosurgery Clinic                           | Goshozuka Clinic Institutional Review Board                                     | 1-21-4 Goshozuka Miyamae-ku, Kawasaki-shi, Kanagawa, 216-0021, Japan            |
| 20170609 | 34038 | Medical Corporation Yufukai Shimoda Neurology Clinic | Goshozuka Clinic Institutional Review Board                                     | 1-21-4 Goshozuka Miyamae-ku, Kawasaki-shi, Kanagawa, 216-0021, Japan            |
| 20170609 | 34039 | Medical Corporation Seikokai Takanoko Hospital       | Medical Corporation Seikokai Takanoko Hospital Institutional Review Board       | 525-1 Takanokomachi, Matsuyama-shi, Ehime, 790-0925, Japan                      |
| 20170609 | 34040 | Medical Corporation Inoue Neurology Clinic           | Medical Corporation Shintokai Yokohama Minoru Clinic Institutional Review Board | 1-13-8 Bessho Minami-ku, Yokohama-shi, Kanagawa, 232-0064, Japan                |
| 20170609 | 34041 | Sakuma Neurological Clinic                           | Goshozuka Clinic Institutional Review Board                                     | 1-21-4 Goshozuka Miyamae-ku, Kawasaki-shi, Kanagawa, 216-0021, Japan            |
| 20170609 | 34042 | Higashi Sapporo Neurology and Neurosurgery Clinic    | Nihonbashi Sakura Clinic Institutional Review Board                             | 1-9-2 Nihonbashikayabacho, Inamura Building 5F, Chuo-ku, Tokyo, 103-0025, Japan |
